# Supplementary material for: Lasso Proteins—Unifying Cysteine Knots and Miniproteins
Source: MDPI journal article supplement (doi:10.3390/polym13223988), 2021-11-18
Supplement: s1 [file s1]

# Lasso proteins – unifying cysteine knots and miniproteins.

## Supplementary Material

Bartosz A. Gren, Pawel Dabrowski-Tumanski, Wanda Niemyska and Joanna I. Sulkowska

## Contents

|          |                                                              |          |
|----------|--------------------------------------------------------------|----------|
| <b>1</b> | <b>Lasso type and lasso fingerprint naming</b>               | <b>1</b> |
| 1.1      | Lasso naming . . . . .                                       | 1        |
| 1.2      | Lasso fingerprint naming . . . . .                           | 2        |
| <b>2</b> | <b>Protein set and determination of loop-forming bonds</b>   | <b>2</b> |
| <b>3</b> | <b>Conservation of lasso type</b>                            | <b>2</b> |
| 3.1      | Homologs with different lasso type . . . . .                 | 3        |
| 3.2      | Conservation of the bridge . . . . .                         | 3        |
| <b>4</b> | <b>Quantifying stabilization of lasso motif</b>              | <b>4</b> |
| 4.1      | The mean number of bulky residues . . . . .                  | 4        |
| 4.2      | Localization of minima of B-factor curve . . . . .           | 4        |
| 4.3      | Calculation of minima and maxima of discrete curve . . . . . | 4        |
| <b>5</b> | <b>Function and location of complex lasso proteins</b>       | <b>4</b> |

## 1 Lasso type and lasso fingerprint naming

### 1.1 Lasso naming

There are four groups of lasso motifs, differing in the type of complexity:

- The *LS* group in which only one tail pierce the covalent loop, but between two consecutive piercings it winds around the loop;
- The *L* group in which only one tail pierce the loop and between none two consecutive piercings does it wind around the loop – the piercings are in the "there and back" maner;
- The *LL* group in which two tails pierce the same covalent loop (without winding around the loop);
- The *LLS* group in which two tails pierce the same covalent loop and at least one winds around the loop.

To each piercing one can prescribe the piercing tail (N- or C-terminal) and piercing direction. The piercing direction is determined as in [Dabrowski-Tumanski et al., 2016], utilizing the fact, that the orientation of the surface is determined unequivocally by the orientation of the chain, being the boundary of the surface. Therefore in principle, one can then describe each lasso motif by assigning for each tail a sequence of signs denoting orientation of each piercing. This method is used for *LS* and *LLS* group. For convenience, in the *LS* group also the total number of piercings in being attached, e.g.  $LS_{2--C}$ ,  $LS_{3-++N}$ ,  $LLS_{--,-+}$ ,  $LLS_{--,,++}$ . In case of *LLS* group the first subscript denotes the orientation of piercings for N-terminus, the second (after comma) for the C-terminus, given in the sequential order. None protein of *LLS* group was found in entire PDB.

In case of *LL* and *L* group all the piercings sign sequence will be alternating – after + one always gets – and *vice versa*. Therefore, for these both groups it is sufficient to give explicitly orientation only of the sequentially first piercings for both tail and the total number of piercings. In particular  $L_{-2N} = L_{-+N}$ ,  $L_{+3C} = L_{++C}$ ,  $LL_{-4,+3} = LL_{-+++,++}$  etc. Note, that in case of piercings performed by N-terminus, adding new piercing changes sign, e.g. adding a piercing to  $L_{-2N} = L_{-+N}$  results in  $L_{++N} = L_{+3N}$  lasso motif.

The possible lasso types for small number of piercings is shown in the Figs. 2 and 3 in main text. The number of possible lasso types rises with the total number of piercing. If the structure has  $n$  piercings in total, it can be obtained with  $x$  and  $y$  piercings performed by N- and C-terminus respectively, with  $x, y \geq 0$  and  $x + y = n$ . There are  $n + 1$  possibilities, how much piercings are performed by N-terminus (and therefore by C-terminus also). Moreover, for  $x$  piercings performed by N-terminus, each can be either positive, or negative (same for C-terminus). Therefore the number of lasso types for  $n$  piercings in total is given by  $N = (n + 1) \cdot 2^x \cdot 2^y = (n + 1) \cdot 2^n$ .

## 1.2 Lasso fingerprint naming

The lasso fingerprints are build as a concatenation of lasso motifs in their sequential order. To include only the topologically non-trivial part of the structure the  $L_0$  loops are suppressed. Moreover, to simplify the notion, the sign and the piercing tail are also suppressed. Moreover, the symbols denoting the same motif present sequentially one after another are merged, e.g. instead of  $L_1L_1$  we write  $2L_1$ .

## 2 Protein set and determination of loop-forming bonds

In the analysis we used all the protein chains deposited in RCSB database, found in October 2020 – 535,079. 78,723 (14.7%) chains possessed a linkage between residues (either disulfide, or N-C, C-O, C-C or C-S). 52,832 (67.1%) out of those chains were topologically certain, i.e. possessed either no gap, or the gap was less or equal to 6 residues. Moreover, the  $C\alpha$  atoms of consecutive residues were located in resonable distance (2.0-4.2 Å). The remaining 32.9% of chains were classified as artifacts. Both sets were analyzed independently using algorithm described in [Niemyska et al., 2016, Dabrowski-Tumanski et al., 2016]. Finally, 8,527 chains topologically certain complex lasso proteins were identified. Note, that these proteins constitute 16.1% fraction of all topologically certain protein chains with any kind of intra-residue linkages.

18 complex lasso proteins were build on non-disulfide-based covalent loop (described in main text). In general, the information about the non-disulfide bridge is extracted from the LINK line in the PDB file. This however has to be filtered scrupulously, as in many cases such information is misleading. The possibly artificial LINKs in PDB file include:

- To high energy of the bond (e.g. O-O bond);
- Wrong number of substituents (e.g. 7 substituents for carbon atom, with only 4 possible);
- Wrong geometry of bonds (e.g. too small or to large angle between substituents)
- Wrong bond distance (e.g. 10 Å);
- Mixture of positions of atoms from alternative structures.

In some cases there is no sharp criterion to distinguishing between real and artificial bond. In such cases one can compare the structure with its homolog. The formation of nonstandard bond joining residues involves rather complex cell mechanisms, therefore it is supposed to be functionally important for the protein. Hence such bonds should be also present in homological chains with the same function.

The complex lasso proteins with non-disulfide-based pierced covalent loop are summarized in Tables S1 and S2:

Table S1: List of nontrivial loops closed by an amide bridge. In the parenthesis the indices of loop-forming residues are given.

| Lasso topology | Loops                                                                                                                                                                                                                                                                                                                                                                                  |
|----------------|----------------------------------------------------------------------------------------------------------------------------------------------------------------------------------------------------------------------------------------------------------------------------------------------------------------------------------------------------------------------------------------|
| $L_{-1C}$      | 1RPB <sub>A</sub> (1-9); 1RPC <sub>A</sub> (1-9); 2LS1 <sub>A</sub> (1-9); 2LTI <sub>A</sub> (1-9); 2LX6 <sub>A</sub> (1-8); 2M37 <sub>A</sub> (1-9); 2M8F <sub>A</sub> (1-9); 2MFV <sub>A</sub> (1-7); 2MW3 <sub>A</sub> (1-9); 2N5C <sub>A</sub> (8-1); 2N6V <sub>A</sub> (1-9); 3NJW <sub>A</sub> (1-9); 4NAG <sub>A</sub> (1-7); 4NAG <sub>B</sub> (1-7); 5JQF <sub>A</sub> (1-9); |

## 3 Conservation of lasso type

The lasso type is prone to change upon mutation of only one but crucial residue – the bridge forming cysteine. Moreover, there are several reasons for which the bridge can be missing in the crystal structure, hiding the lasso conservation analysis:

- lack of bridge due to insufficient structure resolution;
- addition of artificial bridge due to misinterpretation of the electron density;
- lack of bridge due to its damage caused by long exposure to radiation.

Furthermore, the lasso motif may change among homology cluster, if the piercing is close to the termini or to the bridge – the terminus may be truncated destabilizing or reducing the piercings, while slight movement of the chain may shift piercing closer towards the bridge, causing piercing reduction (the arbitrary criterion is that the piercing must be located at least 3 residues from the bridge). This altogether hiders analysis of the conservation of lasso motif in the homology cluster. The examples of different reasons for change of lasso type are given in the next subsection.

Table S2: List of nontrivial loops closed by a thioester or ester bridge. In the parenthesis the indices of loop-forming residues are given.

| Bond type     | Uniprot ID | Structures with lasso                       | # all structures | % structures with lasso | Lasso types                    |
|---------------|------------|---------------------------------------------|------------------|-------------------------|--------------------------------|
| thioester C-S | D9IEJ2     | 4ZYP_C (69-212);                            | 8                | 12.5                    | $LL_{+1,+2}$                   |
|               | P19491     | 4P9H_LG (65-115);                           | 169              | 1.2                     | $L_{-1N}$                      |
|               | P23793     | 5VHY_B (718-773); 5VHY_D (718-773);         | 4                | 50                      | $L_{-1N}$                      |
|               | Q0ED31     | 1S9R_A (398-950); 1S9R_B (398-951);         | 27               | 3.7                     | $LL_{+1,-3}$                   |
|               | Q1WDM0     | 5DUM_A (90-135);                            | 10               | 10                      | $L_{-1C}$                      |
|               | Q6TS43     | 5H0S_C (299-1265);                          | 22               | 4.5                     | $L_{+2C}$                      |
|               | Q94218     | 5XDA_E (461-503);                           | 8                | 12.5                    | $L_{-1C}$                      |
|               | Q99972     | 4WXQ_A (245-433);                           | 13               | 7.7                     | $L_{-1C}$                      |
|               | Q9AQQ8     | 3A55_A (47-156); 3A55_B (47-156);           | 8                | 25                      | $LL_{+1,+2}$                   |
|               | Q9BJF5     | 4YGA_H (51-104)                             | 45               | 2.2                     | $L_{-1N}$                      |
| ester C-O     | A0A0D0F5I0 | 5WTL_Z (291-837)                            | 1                | 100.0                   | $LL_{-1,+1}$                   |
|               | A0A1L8F5J9 | 5TQ2_B (44-266)                             | 60               | 1.7                     | $L_{+1N}$                      |
|               | D5AHU8     | 5DBU_G (6-195)                              | 23               | 4.3                     | $L_{+1C}$                      |
|               | O00308     | 5TJQ_A (500-664)                            | 7                | 14                      | $L_{+1C}$                      |
|               | P00336     | 5LDH_A (188-333); 5LDH_B (188-333)          | 8                | 25                      | $L_{-1N}$                      |
|               | P31539     | 5VYA_D (213-387);                           | 61               | 1.6                     | $L_{+1N}$                      |
|               | P97438     | 6CQ9_A (37-268);                            | 42               | 2.4                     | $L_{+1C}$                      |
|               | Q1RS72     | 5ERB_C (139-614);                           | 1                | 100                     | $L_{-2N}$                      |
|               | Q2PBR5     | 3P06_A (738-830);                           | 1                | 100                     | $L_{+1N}$                      |
|               | Q8IL11     | 4X2T_G (512-603);                           | 120              | 0.83                    | $L_{+1N}$                      |
|               |            | 1M8Q_D (506-764); 1MVW_A (502-764,505-762); |                  |                         |                                |
|               |            | 1MVW_M (502-764,505-762) 1O18_D (506-764);  |                  |                         |                                |
|               |            | 1O19_A (505-762,502-764); 1O1A_A (505-762); |                  |                         |                                |
|               | P13538     | 1O1A_D (506-764); 1O1C_A (502-764,505-762); | 64               | 20                      | $L_{+1N}; L_{+2N}; LL_{+1,-1}$ |
|               |            | 1O1C_D (506-764,506-764); 1O1E_A            |                  |                         |                                |
|               |            | (502-764,505-762); 1O1E_D (506-764); 1O1G_A |                  |                         |                                |
|               |            | (502-764,505-762); 1O1G_D (506-764);        |                  |                         |                                |

### 3.1 Homologs with different lasso type

**Lack of bridge** Chain A of human hydroxylase with PDB code 4GWM has no disulfide bridge compared to its 100% homolog – chain B. The reason is probably a long exposure to radiation [Arolas et al., 2012].

**Doubtful bridge** Transport protein with PDB code 2WWX is the solely one structure with complex topology among 688 proteins in the homology cluster. Moreover, almost 99% of its homologs (671 structures) has no disulfide bridge at all. Another example can be oxidoreductase with PDB code 2YAU exhibiting  $L_{+2N}$  topology – none of its homologs (including five 100% sequential homologs) have any threaded loop.

**Piercing to close to terminus** Proteins with  $LL_{+4,-2}$  and  $LL_{+4,-3}$  lasso types (PDB codes 1CQ3, 2FFK, 2FIN, 2GRK) are in the same homology cluster. However the structure with  $LL_{+4,-2}$  lasso type possesses also the third crossing performed by C-terminus. This crossing is however too close to the terminus (2 residues) and therefore was counted as inessential. On the other hand, in case of  $LL_{+4,-3}$  topology proteins the last crossing is placed in the distance of 3 residues from the terminus, therefore it was included in our analysis.

**Piercing to close to the bridge** Membrane protein with PDB code 3G5C has two sequentially identical chains (being the only representants of homology cluster). These chains however differ in topology, as chain A has no pierced covalent loop, whereas chain B has one closed loop with  $L_{-1C}$  lasso type. The difference stems from the fact, that in chain A the piercing is located 2 residues from the closed loop (hence it is reduced), while in chain B the distance is 3 residues (and it is preserved).

### 3.2 Conservation of the bridge

To avoid the aforementioned problems in investigating the entanglement conservation we followed the procedure described in [Thangudu et al., 2008]. First, in each homology cluster of 30% sequential homology we reduced highly homological sequences (with sequential homology larger than 95%). In 65% of (reduced) clusters only one sequence was contained. That means, that in most cases complex lasso proteins are unique.

In the rest of the clusters, containing at least 2 sequentially different chains, we calculated the conservation of the bridge. The structures were aligned using Clustal server via its Perl web client. The cysteine residue was called conserved between two sequences, if its index was shifted maximally by one. The bridge was called highly conserved if both bridge-forming residues were conserved in at least 80% of sequences, poorly conserved if at least one residue was conserved in less than 30%. In other case the bridge was

called medium conserved. Note, that in case of clusters containing less than 5 sequences, the bridge was called highly conserved if the bridge-forming cysteines were conserved in all the sequences.

The other method used by us to determine the lasso conservation was to prescribe to each lasso the PFAM domain it belong to. Then we obtained the list of lasso types for each PFAM domain. Next we calculated the fraction of complex lasso, trivial lasso and no-loop structures.

## 4 Quantifying stabilization of lasso motif

To quantify the stabilization of lasso motif we calculated the sequential distance between piercing and the minimum of B-factor (or mean square fluctuation) and the maximum concentration of the bulky residues. These methods are described in subsections below.

### 4.1 The mean number of bulky residues

To calculate the steric hindrance in vicinity of lasso piercing we calculated, how many bulky residues are in the sequential distance of 2 residues in each direction from the piercing (i.e. how many bulky residues are among 5 residues, middle one being the piercing residue). As the bulky residues we considered those with average volume  $\geq 150\text{\AA}^3$ , determined for the buried-ligand-water set in [Tsai et al., 1999], i.e. Arg, Trp, Met, Ile, Tyr, Leu, Phe, His. Therefore we obtained a curve for which for each residue index a natural number  $\in 1 \dots 5$ . For such curve we determined its maxima (according to the procedure described in following subsection) – the maxima of the bulky residue concentration. Finally, for each piercing we calculated the sequential distance from the nearest (in terms of sequential distance) maximum of bulky residues concentration.

### 4.2 Localization of minima of B-factor curve

To measure the general stability of each residue, the B-factor of  $C\alpha$  atom for crystal structure or mean square displacement of  $C\alpha$  atoms for NMR structures was used. The mean square displacement was calculated from the first model. This resulted with a specific value for an residue index. Than we calculated the minima of such curve (as in the subsection below) obtaining the minima of B-factor. Next, for each piercing the lowest sequential distance from the B-factor (or mean square deviation) was calculated.

### 4.3 Calculation of minima and maxima of discrete curve

The minima and the maxima of the discrete curves were calculated with similar algorithms, with the exception, that the values of 4 and 5 in case of the concentration of bulky residues were classified automatically as maximum.

The procedure of finding an extrema starts with smoothing the curve with the running average in the window of 1/10 size of the protein (the floor function – the largest integer value lower or equal to 1/10 of the size). Than the local minima (maxima), i.e. the points for which both neighbouring values are greater (lower) than the value in that specific points are taken. Next we "restored" the minima (maxima) of the original curve in the vicinity of the local minima (maxima) found for the smoothed curve. In the window equal to 1/5 of the protein size centered in the minimum (maximum) of the smoothed curve we searched for the minimal (maximal) value. This value was called minimum (maximum) of the analyzed discrete curve.

## 5 Function and location of complex lasso proteins

For each PFAM domain we checked what lasso motifs represent such domain. Moreover, for each domain we extracted the representative structure from the non-redundant set, the PFAM clan and cellular location they represent (C – cellular, M – membrane, S – secreted). For the representative protein we also checked the lasso loop size. The data are included in Tab. S3.

Table S3: The table containing the information about PFAM domain, CLAN and representative protein chain. The different lasso motifs found within PFAM domain are placed in the "Lasso types" column separated with semicolon. Representative protein chain always has the first of aforementioned lasso types. Abbreviations used in "Cellular location" column: C – cellular, M – membrane, S – secreted.

| PFAM identifier | PFAM domain                                       | PFAM clan | Lasso types                                | Representant      | Lasso loop size | Cellular location |
|-----------------|---------------------------------------------------|-----------|--------------------------------------------|-------------------|-----------------|-------------------|
| PF00007         | Cystine-knot domain                               | CL0079    | $L_{-1}C$                                  | 5BPU <sub>A</sub> | 56              | MS                |
| PF00012         | Hsp70 protein                                     | CL0108    | $L_{-1}N$                                  | 4B9Q <sub>A</sub> | 483             | CM                |
| PF00014         | Kunitz/Bovine pancreatic trypsin inhibitor domain | –         | $L_{-1}N$ ; $L_{+1}N$ ; $L_{-1}N, L_{-1}N$ | 5M4V <sub>A</sub> | 22              | –                 |
| PF00020         | TNFR/NGFR cysteine-rich region                    | CL0607    | $L_{-1}N$ ; $L_{-2}C$                      | 3ON9 <sub>A</sub> | 138             | –                 |
| PF00024         | PAN domain                                        | CL0168    | $L_{-1}C$ ; $L_{-1}N$                      | 1KI0 <sub>A</sub> | 129             | S                 |
| PF00026         | Eukaryotic aspartyl protease                      | CL0129    | $L_{-1}N$                                  | 1SGZ <sub>A</sub> | 166             | CM                |
| PF00033         | Cytochrome b/b6/petB                              | CL0328    | $L_{-1}C$                                  | 2FYN <sub>B</sub> | 25              | –                 |
| PF00040         | Fibronectin type II domain                        | CL0602    | $L_{-1}N$                                  | 1YC0 <sub>I</sub> | 22              | S                 |

Continued on the next page

Table S3 – continued from previous page

| PFAM identifier | PFAM domain                                                  | PFAM clan | Lasso types                                                                                 | Representant      | Lasso loop size | Cellular location |
|-----------------|--------------------------------------------------------------|-----------|---------------------------------------------------------------------------------------------|-------------------|-----------------|-------------------|
| PF00047         | Immunoglobulin domain                                        | CL0011    | $L_{-1C}, L_{-1N}; L_{-1N}$                                                                 | 3J70 <sub>D</sub> | 36,68           | –                 |
| PF00048         | Small cytokines<br>(intecrine/chemokine), interleukin-8 like | –         | $L_{-2C}; L_{+1C}; L_{-2C}, L_{+1C};$<br>$L_{-2C}, L_{-2C}; L_{+2C};$<br>$L_{+2C}, L_{+2C}$ | 4HCS <sub>A</sub> | 26              | M                 |
| PF00051         | Kringle domain                                               | CL0602    | $L_{-1C}; L_{-1N}$                                                                          | 6H8M <sub>A</sub> | 65              | S                 |
| PF00054         | Laminin G domain                                             | CL0004    | $L_{-1N}$                                                                                   | 1KDK <sub>A</sub> | 25              | S                 |
| PF00055         | Laminin N-terminal (Domain VI)                               | CL0202    | $L_{-1C};$<br>$LS_{2--C}, L_{-1N}, L_{-1N};$<br>$L_{-1N}; LS_{2--C}, L_{-1N}$               | 4OVE <sub>A</sub> | 34              | CS                |
| PF00057         | Low-density lipoprotein receptor domain class A              | –         | $L_{-3N}; L_{-1N}$                                                                          | 2RD7 <sub>C</sub> | 93              | MS                |
| PF00061         | Lipocalin / cytosolic fatty-acid binding protein family      | CL0116    | $L_{-3N}; L_{-1N}; L_{-1N}, L_{-1N};$<br>$L_{-3N}, L_{-3N}; L_{-2N}$                        | 2L5P <sub>A</sub> | 106             | S                 |
| PF00062         | C-type lysozyme/alpha-lactalbumin family                     | CL0037    | $LS_{3+-N}$                                                                                 | 2FYD <sub>B</sub> | 90              | S                 |
| PF00064         | Neuraminidase                                                | CL0434    | $L_{-1C}; L_{+2C}$                                                                          | 4MWJ <sub>A</sub> | 327             | –                 |
| PF00068         | Phospholipase A2                                             | CL0629    | $L_{-1N}$                                                                                   | 3UX7 <sub>A</sub> | 74              | –                 |
| PF00069         | Protein kinase domain                                        | CL0016    | $L_{-1N}$                                                                                   | 4Y8D <sub>C</sub> | 53              | CMS               |
| PF00071         | Ras family                                                   | CL0023    | $L_{+1N}$                                                                                   | 2WWX <sub>A</sub> | 101             | CM                |
| PF00074         | Pancreatic ribonuclease                                      | –         | $L_{+2C}$                                                                                   | 2LT5 <sub>A</sub> | 76              | C                 |
| PF00080         | Copper/zinc superoxide dismutase (SODC)                      | –         | $L_{-1N}; L_{-1N}, L_{-1N}$                                                                 | 4RVP <sub>A</sub> | 90              | CMS               |
| PF00082         | Subtilase family                                             | –         | $L_{+1N}; L_{+1C}; LS_{3+-C};$<br>$LL_{+1,-1}; L_{-1N}$                                     | 5YL7 <sub>A</sub> | 48              | –                 |
| PF00083         | Sugar (and other) transporter                                | CL0015    | $L_{+1N}$                                                                                   | 6H7D <sub>A</sub> | 373             | M                 |
| PF00084         | Sushi repeat (SCR repeat)                                    | CL0001    | $L_{-1N}$                                                                                   | 1C1Z <sub>A</sub> | 39              | –                 |
| PF00085         | Thioredoxin                                                  | CL0172    | $L_{-1N}$                                                                                   | 2IWT <sub>B</sub> | 48              | CS                |
| PF00088         | Trefoil (P-type) domain                                      | CL0630    | $L_{-1C}, L_{-1C}; L_{-1C}$                                                                 | 1PCP <sub>A</sub> | 28,27           | S                 |
| PF00089         | Trypsin                                                      | CL0124    | $L_{-1N}; L_{-1C}, L_{-1N}$                                                                 | 2KAI <sub>I</sub> | 22              | –                 |
| PF00092         | von Willebrand factor type A domain                          | CL0128    | $L_{-1N}; L_{+1N}; L_{+1C}, L_{-2C}$                                                        | 1KNT <sub>A</sub> | 22              | –                 |
| PF00093         | von Willebrand factor type C domain                          | CL0451    | $L_{-1N}$                                                                                   | 1Z78 <sub>A</sub> | 62              | CS                |
| PF00094         | von Willebrand factor type D domain                          | –         | $L_{-1C}; L_{-1N}$                                                                          | 4NT5 <sub>A</sub> | 50              | S                 |
| PF00095         | WAP-type (Whey Acidic Protein) 'four-disulfide core'         | –         | $L_{-1C}, L_{-1C}; L_{-1C}; L_{-1N}$                                                        | 1UDK <sub>A</sub> | 31,22           | S                 |
| PF00100         | Zona pellucida-like domain                                   | CL0159    | $L_{-1N}$                                                                                   | 3QW9 <sub>A</sub> | 70              | MS                |
| PF00102         | Protein-tyrosine phosphatase                                 | CL0031    | $L_{+1N}$                                                                                   | 5K24 <sub>A</sub> | 56              | CM                |
| PF00112         | Papain family cysteine protease                              | CL0125    | $L_{-1N}; L_{-1C}$                                                                          | 4YYQ <sub>A</sub> | 52              | –                 |
| PF00124         | Photosynthetic reaction centre protein                       | –         | $L_{-1C}$                                                                                   | 3KZI <sub>O</sub> | 26              | CM                |
| PF00127         | Copper binding proteins, plastocyanin/azurin family          | CL0026    | $L_{-2C}, L_{-1C}$                                                                          | 1MDA <sub>M</sub> | 33,31           | M                 |
| PF00128         | Alpha amylase, catalytic domain                              | CL0058    | $L_{+1N}; L_{-1N}; L_{-1C}$                                                                 | 3VM5 <sub>A</sub> | 46              | –                 |
| PF00129         | Class I Histocompatibility antigen, domains alpha 1 and 2    | CL0343    | $L_{-1N}; L_{+1C}$                                                                          | 4HKJ <sub>D</sub> | 150             | M                 |
| PF00141         | Peroxidase                                                   | CL0617    | $L_{-2N}$                                                                                   | 1H5A <sub>A</sub> | 205             | CS                |
| PF00143         | Interferon alpha/beta domain                                 | CL0053    | $L_{+1C}$                                                                                   | 3PIW <sub>A</sub> | 96              | S                 |
| PF00149         | Calcineurin-like phosphoesterase                             | CL0163    | $L_{+2N}; L_{+1N}; L_{-1N}$                                                                 | 1OI8 <sub>A</sub> | 335             | M                 |
| PF00150         | Cellulase (glycosyl hydrolase family 5)                      | CL0058    | $L_{+1N}; L_{+1C}$                                                                          | 5Y6T <sub>A</sub> | 67              | CS                |
| PF00160         | Cyclophilin type peptidyl-prolyl cis-trans isomerase/CLD     | CL0475    | $L_{-2N}$                                                                                   | 5EX1 <sub>A</sub> | 124             | –                 |
| PF00161         | Ribosome inactivating protein                                | –         | $L_{-1N}; L_{+1C}$                                                                          | 4LGP <sub>B</sub> | 51              | CMS               |
| PF00168         | C2 domain                                                    | CL0154    | $L_{+1C}$                                                                                   | 6EI6 <sub>B</sub> | 114             | C                 |
| PF00188         | Cysteine-rich secretory protein family                       | CL0659    | $L_{-1C}; L_{-1C}, L_{-1C}$                                                                 | 6ANY <sub>A</sub> | 89              | –                 |
| PF00194         | Eukaryotic-type carbonic anhydrase                           | –         | $LS_{2++C}; L_{+1C}$                                                                        | 4YGF <sub>A</sub> | 151             | –                 |
| PF00197         | Trypsin and protease inhibitor                               | CL0066    | $L_{-1N}$                                                                                   | 6KV2 <sub>B</sub> | 45              | –                 |
| PF00209         | Sodium:neurotransmitter symporter family                     | CL0062    | $L_{-1C}$                                                                                   | 6M17 <sub>E</sub> | 54              | CMS               |
| PF00232         | Glycosyl hydrolase family 1                                  | CL0058    | $L_{+5C}; L_{+1C}, L_{+1C}; L_{+1C}$                                                        | 5YJ7 <sub>A</sub> | 255             | –                 |
| PF00234         | Protease inhibitor/seed storage/LTP family                   | CL0482    | $L_{+1N}$                                                                                   | 1B1U <sub>A</sub> | 57              | CS                |
| PF00236         | Glycoprotein hormone                                         | CL0079    | $L_{-1C}, L_{-1N}$                                                                          | 1FL7 <sub>B</sub> | 50,85           | –                 |
| PF00246         | Zinc carboxypeptidase                                        | CL0035    | $L_{+1N}; L_{+1C}$                                                                          | 3MN8 <sub>C</sub> | 41              | –                 |
| PF00255         | Glutathione peroxidase                                       | CL0172    | $L_{+1N}$                                                                                   | 2RM5 <sub>A</sub> | 49              | –                 |
| PF00264         | Common central domain of tyrosinase                          | CL0205    | $L_{-2C}; L_{-2C}, L_{+2C}; L_{-1N}$                                                        | 4Z0Y <sub>A</sub> | 64              | C                 |
| PF00274         | Fructose-bisphosphate aldolase class-I                       | CL0035    | $L_{-1N}$                                                                                   | 5O0W <sub>E</sub> | 68              | CMS               |
| PF00280         | Potato inhibitor I family                                    | CL0367    | $L_{+1C}$                                                                                   | 1TIN <sub>A</sub> | 46              | –                 |
| PF00288         | GHMP kinases N terminal domain                               | CL0329    | $L_{-2N}$                                                                                   | 1KKH <sub>A</sub> | 175             | C                 |
| PF00324         | Amino acid permease                                          | CL0062    | $L_{+1N}$                                                                                   | 6KKR <sub>A</sub> | 464             | M                 |

Continued on the next page

Table S3 – continued from previous page

| PFAM identifier | PFAM domain                                                          | PFAM clan | Lasso types                                                                                                                                                                                                                                                                          | Representant      | Lasso loop size | Cellular location |
|-----------------|----------------------------------------------------------------------|-----------|--------------------------------------------------------------------------------------------------------------------------------------------------------------------------------------------------------------------------------------------------------------------------------------|-------------------|-----------------|-------------------|
| PF00326         | Prolyl oligopeptidase family                                         | CL0028    | $L_{-1}C$                                                                                                                                                                                                                                                                            | 5TXE <sub>D</sub> | 9               | CS                |
| PF00330         | Aconitase family (aconitate hydratase)                               | —         | $L_{+1}C$                                                                                                                                                                                                                                                                            | 4KP1 <sub>A</sub> | 264             | C                 |
| PF00332         | Glycosyl hydrolases family 17                                        | CL0058    | $L_{-1}N$                                                                                                                                                                                                                                                                            | 2JON <sub>A</sub> | 47              | S                 |
| PF00340         | Interleukin-1 / 18                                                   | CL0066    | $L_{-2}C$                                                                                                                                                                                                                                                                            | 1IRA <sub>Y</sub> | 44              | CMS               |
| PF00370         | FGGY family of carbohydrate kinases, N-terminal domain               | CL0108    | $L_{+1}N$                                                                                                                                                                                                                                                                            | 3KZB <sub>A</sub> | 39              | —                 |
| PF00400         | WD domain, G-beta repeat                                             | CL0186    | $L_{-1}C$                                                                                                                                                                                                                                                                            | 5GSA <sub>B</sub> | 324             | C                 |
| PF00403         | Heavy-metal-associated domain                                        | CL0704    | $L_{-1}N$                                                                                                                                                                                                                                                                            | 1DO5 <sub>A</sub> | 87              | CMS               |
| PF00405         | Transferrin                                                          | CL0177    | $L_{+1}N, L_{-1}N, LS_{2--N};$<br>$LS_{2--N}; LS_{3--++N};$<br>$LS_{3--++N}, L_{-1}N, LS_{2--N};$<br>$LS_{2--N}, L_{-1}N, LS_{2--N};$<br>$LS_{2--N}, L_{+1}N, L_{-1}N, LS_{2--N};$<br>$L_{-1}N, LS_{2--N};$<br>$LS_{3--++N}, L_{+1}N, L_{-1}N, LS_{2--N};$<br>$L_{-1}N, LS_{3--++N}$ | 1BIY <sub>A</sub> | 195,280, 223    | CMS               |
| PF00419         | Fimbrial protein                                                     | CL0204    | $L_{-1}N$                                                                                                                                                                                                                                                                            | 5CYL <sub>D</sub> | 173             | CM                |
| PF00423         | Haemagglutinin-neuraminidase                                         | CL0434    | $L_{-1}N$                                                                                                                                                                                                                                                                            | 6P7S <sub>B</sub> | 65              | M                 |
| PF00431         | CUB domain                                                           | CL0164    | $L_{-1}C; L_{-2}C, L_{-2}C$                                                                                                                                                                                                                                                          | 1Q3X <sub>A</sub> | 119             | S                 |
| PF00445         | Ribonuclease T2 family                                               | —         | $L_{-1}C, L_{-1}C; L_{-1}C$                                                                                                                                                                                                                                                          | 1SGL <sub>A</sub> | 59,34           | C                 |
| PF00450         | Serine carboxypeptidase                                              | CL0028    | $L_{+1}N$                                                                                                                                                                                                                                                                            | 1AC5 <sub>A</sub> | 267             | CM                |
| PF00457         | Glycosyl hydrolases family 11                                        | CL0004    | $L_{-1}C$                                                                                                                                                                                                                                                                            | 3WP6 <sub>A</sub> | 169             | S                 |
| PF00464         | Serine hydroxymethyltransferase                                      | CL0061    | $LL_{-1,-1}; LL_{-2,-1}$                                                                                                                                                                                                                                                             | 4PFF <sub>A</sub> | 240             | —                 |
| PF00483         | Nucleotidyl transferase                                              | CL0110    | $L_{+1}N$                                                                                                                                                                                                                                                                            | 4JD0 <sub>A</sub> | 210             | C                 |
| PF00486         | Transcriptional regulatory protein, C terminal                       | CL0123    | $L_{+1}N$                                                                                                                                                                                                                                                                            | 3LY7 <sub>A</sub> | 65              | M                 |
| PF00496         | Bacterial extracellular solute-binding proteins, family 5 Middle     | CL0177    | $L_{+1}C$                                                                                                                                                                                                                                                                            | 2D5W <sub>A</sub> | 145             | M                 |
| PF00497         | Bacterial extracellular solute-binding proteins, family 3            | CL0177    | $L_{+3}C$                                                                                                                                                                                                                                                                            | 6H1U <sub>A</sub> | 102             | MS                |
| PF00503         | G-protein alpha subunit                                              | CL0023    | $L_{-2}C$                                                                                                                                                                                                                                                                            | 6LFM <sub>D</sub> | 28              | —                 |
| PF00509         | Haemagglutinin                                                       | —         | $L_{-1}C$                                                                                                                                                                                                                                                                            | 6II4 <sub>A</sub> | 43              | —                 |
| PF00523         | Fusion glycoprotein F0                                               | CL0595    | $L_{+1}N; L_{-1}C$                                                                                                                                                                                                                                                                   | 5EJB <sub>B</sub> | 122             | —                 |
| PF00530         | Scavenger receptor cysteine-rich domain                              | CL0550    | $L_{-1}C; L_{-1}C, L_{-3}C$                                                                                                                                                                                                                                                          | 2JOP <sub>A</sub> | 66              | M                 |
| PF00535         | Glycosyl transferase family 2                                        | CL0110    | $L_{+3}N; L_{+2}N$                                                                                                                                                                                                                                                                   | 6S24 <sub>A</sub> | 82              | C                 |
| PF00540         | gag gene protein p17 (matrix protein)                                | CL0074    | $L_{+1}C$                                                                                                                                                                                                                                                                            | 4DQE <sub>A</sub> | 23              | —                 |
| PF00544         | Pectate lyase                                                        | CL0268    | $L_{-1}N$                                                                                                                                                                                                                                                                            | 1QCX <sub>A</sub> | 135             | S                 |
| PF00545         | ribonuclease                                                         | —         | $L_{-3}C$                                                                                                                                                                                                                                                                            | 3AGN <sub>A</sub> | 54              | C                 |
| PF00553         | Cellulose binding domain                                             | CL0203    | $L_{+1}N; LL_{+1,-1}$                                                                                                                                                                                                                                                                | 2CKR <sub>B</sub> | 241             | —                 |
| PF00557         | Metallopeptidase family M24                                          | —         | $LL_{-1,-1}$                                                                                                                                                                                                                                                                         | 1R58 <sub>A</sub> | 221             | C                 |
| PF00561         | alpha/beta hydrolase fold                                            | CL0028    | $L_{+1}C$                                                                                                                                                                                                                                                                            | 4HS9 <sub>A</sub> | 58              | S                 |
| PF00576         | HIUase/Transthyretin family                                          | CL0287    | $L_{-3}N$                                                                                                                                                                                                                                                                            | 1QAB <sub>E</sub> | 105             | CS                |
| PF00578         | AhpC/TSA family                                                      | CL0172    | $L_{+1}N$                                                                                                                                                                                                                                                                            | 2CVB <sub>A</sub> | 129             | —                 |
| PF00594         | Vitamin K-dependent carboxylation/gamma-carboxyglutamic (GLA) domain | CL0001    | $L_{-1}N; L_{-1}N, L_{-1}N$                                                                                                                                                                                                                                                          | 1BTH <sub>Q</sub> | 22              | —                 |
| PF00599         | Influenza Matrix protein (M2)                                        | —         | $L_{-1}N$                                                                                                                                                                                                                                                                            | 6S0Y <sub>A</sub> | 57              | CMS               |
| PF00625         | Guanylate kinase                                                     | CL0023    | $L_{+1}N$                                                                                                                                                                                                                                                                            | 1S4Q <sub>A</sub> | 154             | C                 |
| PF00652         | Ricin-type beta-trefoil lectin domain                                | CL0066    | $L_{+2}C$                                                                                                                                                                                                                                                                            | 3WMY <sub>A</sub> | 269             | S                 |
| PF00664         | ABC transporter transmembrane region                                 | CL0241    | $L_{-1}N$                                                                                                                                                                                                                                                                            | 6QV2 <sub>E</sub> | 60              | CMS               |
| PF00683         | TB domain                                                            | —         | $L_{-1}N$                                                                                                                                                                                                                                                                            | 1KSQ <sub>A</sub> | 26              | S                 |
| PF00688         | TGF-beta propeptide                                                  | CL0055    | $L_{-1}N$                                                                                                                                                                                                                                                                            | 3B4V <sub>D</sub> | 45              | S                 |
| PF00704         | Glycosyl hydrolases family 18                                        | CL0058    | $LL_{+1,-1}; L_{+1}N$                                                                                                                                                                                                                                                                | 5XWQ <sub>A</sub> | 158             | —                 |
| PF00706         | Anenome neurotoxin                                                   | CL0075    | $L_{-1}C$                                                                                                                                                                                                                                                                            | 1AHL <sub>A</sub> | 31              | S                 |
| PF00711         | Beta defensin                                                        | CL0075    | $L_{-1}C$                                                                                                                                                                                                                                                                            | 1E4Q <sub>A</sub> | 16              | S                 |
| PF00726         | Interleukin 10                                                       | CL0053    | $L_{+1}C$                                                                                                                                                                                                                                                                            | 4DOH <sub>A</sub> | 94              | S                 |
| PF00732         | GMC oxidoreductase                                                   | CL0063    | $L_{+1}N$                                                                                                                                                                                                                                                                            | 1CF3 <sub>A</sub> | 43              | S                 |
| PF00754         | F5/8 type C domain                                                   | CL0202    | $L_{-1}C$                                                                                                                                                                                                                                                                            | 3JD6 <sub>O</sub> | 33              | MS                |
| PF00760         | Cucumovirus coat protein                                             | CL0055    | $L_{-1}C$                                                                                                                                                                                                                                                                            | 1LAJ <sub>A</sub> | 43              | —                 |
| PF00775         | Dioxygenase                                                          | CL0287    | $L_{-6}C$                                                                                                                                                                                                                                                                            | 5VG2 <sub>A</sub> | 44              | —                 |
| PF00777         | Glycosyltransferase family 29 (sialyltransferase)                    | —         | $L_{+1}N$                                                                                                                                                                                                                                                                            | 5BO6 <sub>A</sub> | 204             | CM                |

Continued on the next page

Table S3 – continued from previous page

| PFAM identifier | PFAM domain                                                         | PFAM clan | Lasso types                                                                                                            | Representant      | Lasso loop size       | Cellular location |
|-----------------|---------------------------------------------------------------------|-----------|------------------------------------------------------------------------------------------------------------------------|-------------------|-----------------------|-------------------|
| PF00782         | Dual specificity phosphatase, catalytic domain                      | CL0031    | $L_{+1N}$                                                                                                              | 1X24 <sub>B</sub> | 56                    | CM                |
| PF00811         | Ependymin                                                           | –         | $L_{-1N}; L_{-1N}, L_{-1N}; L_{-3N}$                                                                                   | 6JL9 <sub>A</sub> | 98                    | CS                |
| PF00812         | Ephrin                                                              | CL0026    | $L_{-1N}$                                                                                                              | 2I85 <sub>A</sub> | 65                    | M                 |
| PF00819         | Myotoxin, crotonamine                                               | CL0075    | $L_{-1C}$                                                                                                              | 1H5O <sub>A</sub> | 20                    | S                 |
| PF00840         | Glycosyl hydrolase family 7                                         | CL0004    | $L_{-3N}$                                                                                                              | 6RWF <sub>A</sub> | 126                   | –                 |
| PF00857         | Isochorismatase family                                              | –         | $L_{+1N}$                                                                                                              | 2WTA <sub>A</sub> | 170                   | –                 |
| PF00858         | Amiloride-sensitive sodium channel                                  | –         | $L_{-1N}$                                                                                                              | 4NTW <sub>B</sub> | 22                    | –                 |
| PF00869         | Flavivirus glycoprotein, central and dimerisation domains           | CL0543    | $L_{-1C}$                                                                                                              | 3C5X <sub>C</sub> | 35                    | –                 |
| PF00878         | Cation-independent mannose-6-phosphate receptor repeat              | CL0226    | $L_{+1C}; L_{+1C}, L_{+1C}$                                                                                            | 2L21 <sub>A</sub> | 37                    | M                 |
| PF00879         | Defensin propeptide                                                 | –         | $L_{-1C}$                                                                                                              | 2MXQ <sub>A</sub> | 17                    | S                 |
| PF00884         | Sulfatase                                                           | CL0088    | $L_{-1N}$                                                                                                              | 4FDI <sub>A</sub> | 112                   | C                 |
| PF00913         | Trypanosome variant surface glycoprotein (A-type)                   | –         | $L_{-2N}$                                                                                                              | 6SOY <sub>A</sub> | 229                   | M                 |
| PF00915         | Calicivirus coat protein                                            | CL0055    | $L_{-1N}$                                                                                                              | 5O03 <sub>C</sub> | 61                    | CMS               |
| PF00920         | Dehydratase family                                                  | –         | $L_{+1N}$                                                                                                              | 5J83 <sub>A</sub> | 69                    | –                 |
| PF00925         | GTP cyclohydrolase II                                               | –         | $L_{+1N}$                                                                                                              | 4RL4 <sub>B</sub> | 107                   | C                 |
| PF00930         | Dipeptidyl peptidase IV (DPP IV) N-terminal region                  | CL0186    | $L_{-1C}$                                                                                                              | 6L8Q <sub>B</sub> | 54                    | CMS               |
| PF00933         | Glycosyl hydrolase family 3 N terminal domain                       | CL0058    | $L_{-2N}$                                                                                                              | 3UT0 <sub>A</sub> | 44                    | C                 |
| PF00944         | Alphavirus core protein                                             | CL0124    | $L_{-1C}, L_{-1C}; L_{-1C}$                                                                                            | 5VU2 <sub>M</sub> | 33,34                 | –                 |
| PF00965         | Tissue inhibitor of metalloproteinase                               | CL0353    | $L_{-2C}$                                                                                                              | 1D2B <sub>A</sub> | 70                    | MS                |
| PF00967         | Barwin family                                                       | CL0199    | $L_{+1C}, L_{+1N}$<br>$LL_{-1,+1}, L_{-1N};$<br>$LL_{+1,-1}, L_{-1N};$<br>$L_{+1C}, L_{-1N}$                           | 1BW3 <sub>A</sub> | 33,58                 | S                 |
| PF00974         | Rhabdovirus spike glycoprotein                                      | –         | $LS_{2++C}$                                                                                                            | 5OYL <sub>A</sub> | 47,48                 | –                 |
| PF00999         | Sodium/hydrogen exchanger family                                    | CL0064    | $L_{-1C}; L_{-1C}, L_{-1C};$<br>$LL_{-1,+1}, L_{-1C}, L_{-1C}; L_{-1N}$                                                | 5BZ2 <sub>A</sub> | 100                   | M                 |
| PF01003         | Flavivirus capsid protein C                                         | –         | $L_{-2C}$                                                                                                              | 5H37 <sub>A</sub> | 32                    | –                 |
| PF01015         | Ribosomal S3Ae family                                               | –         | $L_{+1N}$                                                                                                              | 6SW9 <sub>R</sub> | 57                    | C                 |
| PF01032         | FecCD transport family                                              | CL0142    | $L_{+1N}$                                                                                                              | 2QI9 <sub>F</sub> | 77                    | M                 |
| PF01033         | Somatomedin B domain                                                | –         | $L_{+1C}, L_{+2C}, L_{-1N}, L_{-2C}, L_{-2C};$<br>$L_{+1C}, L_{+2C}, L_{-1N}, L_{-1C};$<br>$L_{+1C}, L_{+2C}, L_{-1N}$ | 4B56 <sub>A</sub> | 388,101,<br>47,213,84 | MS                |
| PF01048         | Phosphorylase superfamily                                           | CL0408    | $L_{+1N}$                                                                                                              | 1V4N <sub>A</sub> | 68                    | C                 |
| PF01082         | Copper type II ascorbate-dependent monooxygenase, N-terminal domain | CL0612    | $L_{-1C}$                                                                                                              | 1OPM <sub>A</sub> | 46                    | –                 |
| PF01083         | Cutinase                                                            | CL0028    | $L_{-2C}; L_{+1C}; L_{+1N}$                                                                                            | 4PSC <sub>A</sub> | 37                    | S                 |
| PF01094         | Receptor family ligand binding region                               | CL0144    | $L_{+1N}; L_{-1N}; L_{-1C}, L_{-1N};$<br>$LL_{+1,-1}$                                                                  | 1DP4 <sub>A</sub> | 50                    | M                 |
| PF01108         | Tissue factor                                                       | CL0159    | $L_{+1C}$                                                                                                              | 2HYM <sub>B</sub> | 98                    | MS                |
| PF01109         | Granulocyte-macrophage colony-stimulating factor                    | CL0053    | $L_{-2N}$                                                                                                              | 1CSG <sub>A</sub> | 34                    | S                 |
| PF01113         | Dihydrodipicolinate reductase, N-terminus                           | CL0063    | $L_{+1N}$                                                                                                              | 1B7G <sub>Q</sub> | 27                    | C                 |
| PF01120         | Alpha-L-fucosidase                                                  | CL0058    | $L_{-1C}$                                                                                                              | 5K9H <sub>A</sub> | 419                   | C                 |
| PF01122         | Eukaryotic cobalamin-binding protein                                | CL0059    | $L_{+1C}$                                                                                                              | 2BB5 <sub>A</sub> | 247                   | S                 |
| PF01129         | NAD:arginine ADP-ribosyltransferase                                 | CL0084    | $L_{+1N}$                                                                                                              | 1GXY <sub>A</sub> | 203                   | M                 |
| PF01156         | Inosine-uridine preferring nucleoside hydrolase                     | –         | $L_{-1C}$                                                                                                              | 4I72 <sub>A</sub> | 106                   | C                 |
| PF01161         | Phosphatidylethanolamine-binding protein                            | –         | $L_{+1N}$                                                                                                              | 1FUX <sub>A</sub> | 84                    | M                 |
| PF01202         | Shikimate kinase                                                    | CL0023    | $L_{+1N}$                                                                                                              | 2PT5 <sub>A</sub> | 101                   | C                 |
| PF01244         | Membrane dipeptidase (Peptidase family M19)                         | CL0034    | $L_{+1N}$                                                                                                              | 1ITQ <sub>A</sub> | 33                    | M                 |
| PF01266         | FAD dependent oxidoreductase                                        | CL0063    | $LL_{+1,-1}$                                                                                                           | 5OC3 <sub>A</sub> | 55                    | –                 |
| PF01289         | Thiol-activated cytolysin                                           | CL0293    | $L_{+2C}$                                                                                                              | 5IMY <sub>A</sub> | 219                   | –                 |
| PF01291         | LIF / OSM family                                                    | CL0053    | $L_{+1C}, L_{+1C}$                                                                                                     | 1A7M <sub>A</sub> | 123,114               | MS                |
| PF01301         | Glycosyl hydrolases family 35                                       | CL0058    | $L_{-1C}$                                                                                                              | 5IAZ <sub>A</sub> | 54                    | C                 |
| PF01303         | Egg lysin (Sperm-lysin)                                             | –         | $L_{-1N}$                                                                                                              | 1GAK <sub>A</sub> | 75                    | M                 |
| PF01341         | Glycosyl hydrolases family 6                                        | –         | $L_{+1N}$                                                                                                              | 1DYS <sub>B</sub> | 60                    | S                 |
| PF01352         | KRAB box                                                            | –         | $L_{+1N}$                                                                                                              | 4IJD <sub>A</sub> | 44                    | C                 |
| PF01356         | Alpha amylase inhibitor                                             | –         | $L_{-1N}$                                                                                                              | 1HOE <sub>A</sub> | 29                    | –                 |

Continued on the next page

Table S3 – continued from previous page

| PFAM identifier | PFAM domain                                                | PFAM clan | Lasso types                                                     | Representant      | Lasso loop size  | Cellular location |
|-----------------|------------------------------------------------------------|-----------|-----------------------------------------------------------------|-------------------|------------------|-------------------|
| PF01390         | SEA domain                                                 | –         | $L_{-1N}$                                                       | 1EAW <sub>B</sub> | 22               | –                 |
| PF01391         | Collagen triple helix repeat (20 copies)                   | –         | $L_{-1N}, L_{-1N}; L_{-1C}$                                     | 1LI1 <sub>A</sub> | 56,59            | MS                |
| PF01392         | Fz domain                                                  | CL0644    | $L_{-1C}$                                                       | 5BQC <sub>A</sub> | 56               | MS                |
| PF01395         | PBP/GOBP family                                            | –         | $L_{+1C}$                                                       | 2KPH <sub>A</sub> | 59               | –                 |
| PF01400         | Astacin (Peptidase family M12A)                            | CL0126    | $L_{+1N}$                                                       | 1AST <sub>A</sub> | 157              | CS                |
| PF01401         | Angiotensin-converting enzyme                              | CL0126    | $L_{-2N}; L_{-1C}$                                              | 6S1Y <sub>A</sub> | 146              | –                 |
| PF01404         | Ephrin receptor ligand binding domain                      | CL0202    | $L_{-1N}$                                                       | 3HEI <sub>B</sub> | 61               | MS                |
| PF01453         | D-mannose binding lectin                                   | CL0186    | $LS_{3+-+}C$                                                    | 5GYY <sub>A</sub> | 39               | M                 |
| PF01464         | Transglycosylase SLT domain                                | CL0037    | $L_{+1C}$                                                       | 1GBS <sub>A</sub> | 57               | S                 |
| PF01471         | Putative peptidoglycan binding domain                      | CL0244    | $L_{-2C}$                                                       | 2J0T <sub>E</sub> | 70               | MS                |
| PF01497         | Periplasmic binding protein                                | CL0043    | $L_{+1N}; L_{-1N}$                                              | 5YSC <sub>A</sub> | 81               | M                 |
| PF01510         | N-acetylmuramoyl-L-alanine amidase                         | –         | $L_{-2C}$                                                       | 1YCK <sub>A</sub> | 46               | –                 |
| PF01520         | N-acetylmuramoyl-L-alanine amidase                         | CL0035    | $L_{+1N}$                                                       | 4LQ6 <sub>A</sub> | 49               | –                 |
| PF01542         | Hepatitis C virus core protein                             | –         | $L_{-2C}, L_{-2C}$                                              | 6MEI <sub>C</sub> | 75,28            | –                 |
| PF01543         | Hepatitis C virus capsid protein                           | –         | $L_{-1N}$                                                       | 4CL1 <sub>C</sub> | 49               | –                 |
| PF01547         | Bacterial extracellular solute-binding protein             | CL0177    | $L_{-1N}; L_{+1N}$                                              | 4R2B <sub>A</sub> | 68               | M                 |
| PF01562         | Reprolysin family propeptide                               | –         | $L_{-2C}; L_{-1C}$                                              | 3CKI <sub>B</sub> | 68               | MS                |
| PF01565         | FAD binding domain                                         | CL0077    | $L_{-1C}$                                                       | 6F74 <sub>A</sub> | 85               | –                 |
| PF01567         | Hantavirus glycoprotein G1                                 | CL0159    | $L_{-1C}, L_{-1N}, L_{-1N}, L_{-1N}$                            | 5LJZ <sub>A</sub> | 132,125, 36,135  | –                 |
| PF01570         | Flavivirus polyprotein propeptide                          | –         | $L_{-1C}$                                                       | 4UTC <sub>A</sub> | 32               | –                 |
| PF01593         | Flavin containing amine oxidoreductase                     | CL0063    | $L_{+2C}$                                                       | 5Z2G <sub>B</sub> | 164              | S                 |
| PF01600         | Coronavirus spike glycoprotein S1                          | –         | $L_{-1C}$                                                       | 6B7N <sub>A</sub> | 26               | –                 |
| PF01607         | Chitin binding Peritrophin-A domain                        | CL0155    | $L_{+1N}$                                                       | 5ZNS <sub>A</sub> | 260              | S                 |
| PF01611         | Filovirus glycoprotein                                     | –         | $L_{+1N}$                                                       | 6EA5 <sub>A</sub> | 27               | CM                |
| PF01625         | Peptide methionine sulfoxide reductase                     | –         | $L_{-1N}$                                                       | 2IEM <sub>A</sub> | 148              | C                 |
| PF01630         | Hyaluronidase                                              | CL0058    | $L_{+1N}$                                                       | 2PE4 <sub>A</sub> | 291              | CS                |
| PF01652         | Eukaryotic initiation factor 4E                            | CL0625    | $L_{-1C}$                                                       | 2IDR <sub>A</sub> | 39               | –                 |
| PF01657         | Salt stress response/antifungal                            | –         | $L_{-1C}; L_{-1C}, L_{-1C}$                                     | 3A2E <sub>A</sub> | 77               | S                 |
| PF01716         | Manganese-stabilising protein / photosystem II polypeptide | CL0193    | $L_{-1C}$                                                       | 5G38 <sub>A</sub> | 26               | C                 |
| PF01742         | Clostridial neurotoxin zinc protease                       | CL0126    | $L_{-1N}$                                                       | 6UC6 <sub>C</sub> | 53               | M                 |
| PF01764         | Lipase (class 3)                                           | CL0028    | $L_{+1N}$                                                       | 1USW <sub>A</sub> | 230              | S                 |
| PF01766         | Birnavirus VP2 protein                                     | CL0055    | $L_{-2N}$                                                       | 3P06 <sub>A</sub> | 93               | –                 |
| PF01804         | Penicillin amidase                                         | CL0052    | $L_{-1C}$                                                       | 4YF9 <sub>A</sub> | 90               | –                 |
| PF01823         | MAC/Perforin domain                                        | CL0293    | $L_{-3N}$                                                       | 3NSJ <sub>A</sub> | 167              | CMS               |
| PF01826         | Trypsin Inhibitor like cysteine rich domain                | –         | $L_{-1N}$                                                       | 1ATA <sub>A</sub> | 39               | S                 |
| PF01835         | MG2 domain                                                 | CL0159    | $L_{-2C}$                                                       | 4FXG <sub>C</sub> | 79               | MS                |
| PF01839         | FG-GAP repeat                                              | CL0186    | $L_{+1C}, L_{-2C}; L_{+1C}$                                     | 3IJE <sub>B</sub> | 42,48            | M                 |
| PF01871         | AMMECR1                                                    | –         | $L_{-1N}$                                                       | 1WSC <sub>A</sub> | 57               | –                 |
| PF01979         | Amidohydrolase family                                      | CL0034    | $L_{+1N}$                                                       | 3MTW <sub>A</sub> | 42               | –                 |
| PF02014         | Reeler domain                                              | CL0159    | $L_{-1C}, L_{-1C}, L_{-1C}, L_{-1N}, L_{-1C}; LS_{3+-+}C$       | 5B4X <sub>C</sub> | 40,167, 41,48,41 | S                 |
| PF02015         | Glycosyl hydrolase family 45                               | CL0199    | $L_{+1C}, L_{+1N}, L_{+1N}$                                     | 5H4U <sub>A</sub> | 104,69,116       | S                 |
| PF02024         | Leptin                                                     | CL0053    | $L_{+1N}$                                                       | 1AX8 <sub>A</sub> | 51               | S                 |
| PF02035         | Coagulin                                                   | CL0079    | $L_{+2C}, L_{-1C}$                                              | 1AOC <sub>A</sub> | 86,102           | S                 |
| PF02059         | Interleukin-3                                              | CL0053    | $L_{+1C}$                                                       | 2L3O <sub>A</sub> | 64               | S                 |
| PF02087         | Nitrophorin                                                | CL0116    | $L_{-1N}$                                                       | 1NP1 <sub>A</sub> | 131              | –                 |
| PF02098         | Tick histamine binding protein                             | CL0116    | $L_{-1N}$                                                       | 1QFT <sub>A</sub> | 122              | S                 |
| PF02140         | Galactose binding lectin domain                            | –         | $L_{-1C}, L_{-1C}, L_{-1C}, L_{-1C}; L_{-1C}, L_{-1C}; L_{-1C}$ | 5H4S <sub>A</sub> | 31,27, 34,32     | –                 |
| PF02157         | Mannose-6-phosphate receptor                               | CL0226    | $L_{+1C}$                                                       | 1C39 <sub>A</sub> | 36               | CM                |
| PF02177         | Amyloid A4 N-terminal heparin-binding                      | –         | $L_{-1N}; L_{-1C}$                                              | 1AAP <sub>A</sub> | 22               | –                 |
| PF02191         | Olfactomedin-like domain                                   | CL0434    | $L_{-1C}$                                                       | 6NAX <sub>A</sub> | 189              | CMS               |
| PF02210         | Laminin G domain                                           | CL0004    | $L_{-1N}$                                                       | 3ASI <sub>A</sub> | 29               | M                 |

Continued on the next page



Table S3 – continued from previous page

| PFAM identifier | PFAM domain                                                 | PFAM clan | Lasso types                                                                                                           | Representant      | Lasso loop size | Cellular location |
|-----------------|-------------------------------------------------------------|-----------|-----------------------------------------------------------------------------------------------------------------------|-------------------|-----------------|-------------------|
| PF02225         | PA domain                                                   | CL0364    | $LS_{2--N}$ ;<br>$L_{+1N}, L_{-1N}, LS_{2--N}$ ;<br>$LS_{2--N}, L_{+1N}, L_{-1N}, LS_{2--N}$                          | 1SUV <sub>C</sub> | 195             | –                 |
| PF02244         | Carboxypeptidase activation peptide                         | CL0570    | $L_{+1C}; L_{-1C}, L_{-1C}$ ;<br>$L_{-1N}, L_{-1N}$ ;<br>$L_{-1N}, L_{-1N}, L_{-1N}$                                  | 3HLP <sub>A</sub> | 24              | –                 |
| PF02250         | 35kD major secreted virus protein                           | CL0653    | $L_{+1C}, LL_{+4,-3}; L_{-2C}$ ;<br>$L_{+2C}, L_{-1N}, L_{-3C}$ ;<br>$L_{+1C}, LL_{+4,-2}$ ;<br>$L_{+2C}, LL_{+4,-3}$ | 2FFK <sub>A</sub> | 189,40          | –                 |
| PF02265         | S1/P1 Nuclease                                              | CL0368    | $L_{+1C}$                                                                                                             | 5FB9 <sub>A</sub> | 145             | CS                |
| PF02298         | Plastocyanin-like domain                                    | CL0026    | $L_{-1N}$                                                                                                             | 1F56 <sub>A</sub> | 34              | CMS               |
| PF02375         | jmjN domain                                                 | CL0029    | $LS_{2--N}$                                                                                                           | 5TVS <sub>B</sub> | 73              | –                 |
| PF02383         | SacI homology domain                                        | CL0031    | $L_{+1C}$                                                                                                             | 4XUU <sub>A</sub> | 66              | CM                |
| PF02394         | Interleukin-1 propeptide                                    | –         | $L_{-2C}$                                                                                                             | 1ITB <sub>B</sub> | 44              | CMS               |
| PF02404         | Stem cell factor                                            | CL0053    | $L_{-1N}$                                                                                                             | 2O26 <sub>A</sub> | 96              | CMS               |
| PF02430         | Apical membrane antigen 1                                   | CL0168    | $L_{-1N}$                                                                                                             | 3ZLE <sub>A</sub> | 91              | MS                |
| PF02442         | Lipid membrane protein of large eukaryotic DNA viruses      | –         | $L_{+2C}$                                                                                                             | 1YPY <sub>A</sub> | 88              | –                 |
| PF02458         | Transferase family                                          | CL0149    | $L_{-1N}$                                                                                                             | 2E1T <sub>A</sub> | 309             | –                 |
| PF02469         | Fasciclin domain                                            | –         | $L_{-1C}$                                                                                                             | 1NYO <sub>A</sub> | 135             | S                 |
| PF02489         | Herpesvirus glycoprotein H main domain                      | –         | $L_{-2C}$                                                                                                             | 3PHF <sub>2</sub> | 29              | –                 |
| PF02670         | 1-deoxy-D-xylulose 5-phosphate reductoisomerase             | CL0063    | $L_{+1N}$                                                                                                             | 1K5H <sub>A</sub> | 193             | –                 |
| PF02678         | Pirin                                                       | CL0029    | $L_{-1C}$                                                                                                             | 2VEC <sub>A</sub> | 195             | C                 |
| PF02758         | PAAD/DAPIN/Pyrin domain                                     | CL0041    | $L_{+1N}$                                                                                                             | 4JBM <sub>B</sub> | 163             | C                 |
| PF02784         | Pyridoxal-dependent decarboxylase, pyridoxal binding domain | CL0036    | $L_{-1C}$                                                                                                             | 5GJO <sub>A</sub> | 78              | C                 |
| PF02798         | Glutathione S-transferase, N-terminal domain                | CL0172    | $L_{+1N}$                                                                                                             | 4OFM <sub>A</sub> | 52              | –                 |
| PF02917         | Pertussis toxin, subunit 1                                  | CL0084    | $L_{-1N}$                                                                                                             | 4Z9C <sub>A</sub> | 152             | S                 |
| PF02918         | Pertussis toxin, subunit 2 and 3, C-terminal domain         | CL0658    | $L_{-1N}$                                                                                                             | 4K6LG             | 152             | S                 |
| PF02947         | flt3 ligand                                                 | CL0053    | $L_{-1N}, L_{-2N}$                                                                                                    | 1ETE <sub>A</sub> | 84,40           | MS                |
| PF03045         | DAN domain                                                  | CL0079    | $L_{-1C}$                                                                                                             | 5AEJ <sub>A</sub> | 51              | S                 |
| PF03067         | Lytic polysaccharide mono-oxygenase, cellulose-degrading    | CL0159    | $L_{-1C}$                                                                                                             | 4OPB <sub>A</sub> | 102             | M                 |
| PF03098         | Animal haem peroxidase                                      | CL0617    | $L_{-3C}$                                                                                                             | 2E9E <sub>A</sub> | 162             | –                 |
| PF03122         | Herpes virus major capsid protein                           | –         | $L_{+1N}$                                                                                                             | 6ODM <sub>5</sub> | 132             | –                 |
| PF03146         | Agrin NtA domain                                            | CL0353    | $L_{-2C}; L_{-1N}$                                                                                                    | 1JC7 <sub>A</sub> | 73              | MS                |
| PF03150         | Di-haem cytochrome c peroxidase                             | CL0318    | $L_{-2C}, L_{-1C}$                                                                                                    | 3L4M <sub>C</sub> | 33,32           | –                 |
| PF03165         | MH1 domain                                                  | CL0263    | $L_{-1C}$                                                                                                             | 1MHD <sub>A</sub> | 46              | C                 |
| PF03167         | Uracil DNA glycosylase superfamily                          | –         | $L_{+1N}$                                                                                                             | 3ZOQ <sub>A</sub> | 119             | –                 |
| PF03254         | Xyloglucan fucosyltransferase                               | –         | $L_{+1N}, L_{-1C}$                                                                                                    | 5KOR <sub>B</sub> | 128,28          | CM                |
| PF03330         | Lytic transglycolase                                        | CL0199    | $L_{+1C}, L_{+1N}; L_{+1C}$                                                                                           | 2HCZ <sub>X</sub> | 29,68           | MS                |
| PF03401         | Tripartite tricarboxylate transporter family receptor       | CL0177    | $L_{+1N}; LL_{+1,-1}$                                                                                                 | 2F5X <sub>A</sub> | 37              | M                 |
| PF03480         | Bacterial extracellular solute-binding protein, family 7    | CL0177    | $LS_{2--N}$                                                                                                           | 3FXB <sub>A</sub> | 142             | M                 |
| PF03489         | Saposin-like type B, region 2                               | CL0707    | $L_{-2N}$                                                                                                             | 5W7E <sub>B</sub> | 331             | CS                |
| PF03523         | Macrophage scavenger receptor                               | –         | $L_{-1C}$                                                                                                             | 6J02 <sub>A</sub> | 65              | M                 |
| PF03583         | Secretory lipase                                            | CL0028    | $L_{+1N}$                                                                                                             | 2VEO <sub>A</sub> | 173             | S                 |
| PF03921         | Intercellular adhesion molecule (ICAM), N-terminal domain   | CL0011    | $L_{+1N}$                                                                                                             | 1MQ8 <sub>B</sub> | 139             | –                 |
| PF03958         | Bacterial type II/III secretion system short domain         | –         | $L_{+1N}$                                                                                                             | 6HCG <sub>P</sub> | 55              | M                 |
| PF03968         | LptA/(LptD N-terminal domain) LPS transport protein         | CL0259    | $L_{+1C}, L_{+1C}; L_{+3C}$                                                                                           | 5IV9 <sub>A</sub> | 690,549         | M                 |
| PF03973         | Triabin                                                     | CL0116    | $L_{-1N}$                                                                                                             | 4N7C <sub>A</sub> | 132             | –                 |
| PF03996         | Hemagglutinin esterase                                      | CL0264    | $L_{-1C}; L_{-1C}, L_{-1C}$                                                                                           | 5JIF <sub>A</sub> | 50              | –                 |
| PF04092         | SRS domain                                                  | –         | $L_{-1N}$                                                                                                             | 5WA2 <sub>A</sub> | 122             | M                 |
| PF04137         | Endoplasmic Reticulum Oxidoreductin 1 (ERO1)                | –         | $LL_{-1,+1}$                                                                                                          | 1RP4 <sub>A</sub> | 146             | CM                |
| PF04143         | Sulphur transport                                           | –         | $L_{+1C}$                                                                                                             | 6LEO <sub>A</sub> | 70              | M                 |
| PF04170         | NlpE N-terminal domain                                      | CL0116    | $L_{+1N}$                                                                                                             | 2Z4H <sub>B</sub> | 67              | M                 |
| PF04185         | Phosphoesterase family                                      | CL0088    | $LL_{+1,+1}$                                                                                                          | 2D1G <sub>A</sub> | 54              | –                 |

Continued on the next page

Table S3 – continued from previous page

| PFAM identifier | PFAM domain                                            | PFAM clan | Lasso types                                                              | Representant      | Lasso loop size | Cellular location |
|-----------------|--------------------------------------------------------|-----------|--------------------------------------------------------------------------|-------------------|-----------------|-------------------|
| PF04430         | Protein of unknown function (DUF498/DUF598)            | –         | $L_{+1}C$                                                                | 1IHN <sub>A</sub> | 83              | –                 |
| PF04454         | Encapsulating protein for peroxidase                   | CL0373    | $L_{+1}C$                                                                | 6I9G <sub>A</sub> | 121             | S                 |
| PF04734         | Neutral/alkaline non-lysosomal ceramidase, N-terminal  | –         | $L_{-1}C$                                                                | 2ZXC <sub>A</sub> | 49              | S                 |
| PF05096         | Glutamine cyclotransferase                             | CL0186    | $L_{-1}N$                                                                | 2FAW <sub>A</sub> | 79              | –                 |
| PF05108         | Type VII secretion system ESX-1, transport TM domain B | –         | $L_{-1}C$                                                                | 6SGY <sub>A</sub> | 200             | M                 |
| PF05222         | Alanine dehydrogenase/PNT, N-terminal domain           | CL0325    | $L_{+1}N$                                                                | 2Q99 <sub>A</sub> | 45              | –                 |
| PF05337         | Macrophage colony stimulating factor-1 (CSF-1)         | CL0053    | $L_{-1}N, L_{-2}N$                                                       | 3EJJ <sub>A</sub> | 92,45           | MS                |
| PF05388         | Carboxypeptidase Y pro-peptide                         | –         | $L_{+1}N$                                                                | 1CPY <sub>A</sub> | 243             | C                 |
| PF05431         | Insecticidal Crystal Toxin, P42                        | –         | $LL_{-1,-1}$                                                             | 5FOY <sub>B</sub> | 95              | S                 |
| PF05463         | Sclerostin (SOST)                                      | CL0079    | $L_{-1}C$                                                                | 2KD3 <sub>A</sub> | 55              | S                 |
| PF05550         | Pestivirus Npro endopeptidase C53                      | –         | $L_{-1}N$                                                                | 1S4F <sub>B</sub> | 52              | –                 |
| PF05609         | Lamina-associated polypeptide 1C (LAP1C)               | CL0023    | $L_{+1}N$                                                                | 4TVS <sub>B</sub> | 159             | CM                |
| PF05637         | galactosyl transferase GMA12/MNN10 family              | CL0110    | $L_{+1}N$                                                                | 6BSU <sub>A</sub> | 223             | CM                |
| PF05922         | Peptidase inhibitor I9                                 | CL0570    | $L_{+1}N$                                                                | 4DZT <sub>A</sub> | 33              | –                 |
| PF06083         | Interleukin-17                                         | CL0079    | $LS_{2--}C$                                                              | 4QHU <sub>C</sub> | 97              | S                 |
| PF06119         | Nidogen-like                                           | –         | $L_{-1}N$                                                                | 1NPE <sub>A</sub> | 219             | MS                |
| PF06296         | RelE toxin of RelE / RelB toxin-antitoxin system       | CL0136    | $L_{-1}N$                                                                | 5JA8 <sub>B</sub> | 53              | CMS               |
| PF06309         | Torsin                                                 | CL0023    | $L_{+1}N$                                                                | 5J1T <sub>B</sub> | 159             | CM                |
| PF06328         | Ig-like C2-type domain                                 | CL0159    | $L_{+1}C, L_{+1}C$                                                       | 1PVH <sub>B</sub> | 123,114         | MS                |
| PF06416         | Effector protein NleG                                  | CL0229    | $L_{-1}N$                                                                | 2KKY <sub>A</sub> | 37              | –                 |
| PF06433         | Methylamine dehydrogenase heavy chain (MADH)           | CL0186    | $L_{-2}C, L_{-1}C$                                                       | 3C75 <sub>M</sub> | 33,32           | M                 |
| PF06446         | Hepcidin                                               | –         | $L_{-3}N$                                                                | 4QAE <sub>A</sub> | 100             | –                 |
| PF06484         | Teneurin Intracellular Region                          | –         | $L_{-1}C$                                                                | 6SKE <sub>B</sub> | 31              | CM                |
| PF06511         | Type III secretion systems tip complex components      | –         | $L_{-1}N$                                                                | 5VXK <sub>B</sub> | 59              | CMS               |
| PF06652         | Methuselah N-terminus                                  | –         | $L_{-1}C$                                                                | 1FJR <sub>A</sub> | 95              | M                 |
| PF06702         | Golgi casein kinase, C-terminal, Fam20                 | CL0016    | $L_{-1}C, L_{-1}C$                                                       | 5WRR <sub>A</sub> | 111,113         | CS                |
| PF06744         | Type VI secretion protein IcmF C2-like domain          | CL0154    | $L_{-1}N$                                                                | 4Y7M <sub>A</sub> | 57              | CMS               |
| PF07137         | VDE lipocalin domain                                   | CL0116    | $L_{-1}N$                                                                | 3CQR <sub>A</sub> | 132             | CM                |
| PF07243         | Phlebovirus glycoprotein G1                            | –         | $L_{-1}C$                                                                | 5Y10 <sub>C</sub> | 148             | M                 |
| PF07246         | Phlebovirus nonstructural protein NS-M                 | –         | $L_{-1}N, L_{-1}C; L_{-1}C; L_{-3}N, L_{-1}C$                            | 4HJ1 <sub>A</sub> | 195,49          | –                 |
| PF07249         | Cerato-platanin                                        | CL0199    | $L_{+1}C, L_{+1}N$                                                       | 3SUJ <sub>A</sub> | 38,61           | S                 |
| PF07502         | MANEC domain                                           | CL0168    | $LS_{3+-}C; L_{-1}N$                                                     | 2MSX <sub>A</sub> | 43              | S                 |
| PF07519         | Tannase and feruloyl esterase                          | CL0028    | $L_{+1}C$                                                                | 6FAT <sub>A</sub> | 52              | S                 |
| PF07648         | Kazal-type serine protease inhibitor domain            | CL0005    | $L_{-1}N$                                                                | 3V65 <sub>A</sub> | 27              | MS                |
| PF07653         | Variant SH3 domain                                     | CL0010    | $L_{-1}N$                                                                | 1HJD <sub>A</sub> | 72              | S                 |
| PF07654         | Immunoglobulin C1-set domain                           | CL0011    | $L_{-1}C$                                                                | 2QEJ <sub>A</sub> | 60              | –                 |
| PF07679         | Immunoglobulin I-set domain                            | CL0011    | $L_{-1}C, L_{-1}C; L_{-1}C; L_{+1}C, L_{-2}C; L_{+1}C$                   | 5FTT <sub>C</sub> | 31,183          | M                 |
| PF07686         | Immunoglobulin V-set domain                            | CL0011    | $L_{-2}C; L_{-1}N; L_{+1}C; L_{+1}N; L_{-3}N; L_{-1}C; L_{-1}C, L_{-1}C$ | 5CBA <sub>E</sub> | 28              | MS                |
| PF07691         | PA14 domain                                            | CL0301    | $LS_{2--}C, LS_{2--}N$                                                   | 4GQ7 <sub>A</sub> | 120,88          | M                 |
| PF07714         | Protein tyrosine and serine/threonine kinase           | CL0016    | $L_{-1}C$                                                                | 5GZA <sub>A</sub> | 68              | CM                |
| PF07715         | TonB-dependent Receptor Plug Domain                    | –         | $L_{+1}N, L_{-1}N, LS_{2--}N; LS_{3--}+N, L_{+1}N, L_{-1}N, LS_{2--}N$   | 3V89 <sub>B</sub> | 192,273, 220    | –                 |
| PF07728         | AAA domain (dynein-related subfamily)                  | CL0023    | $L_{-1}C$                                                                | 6P0F <sub>A</sub> | 54              | C                 |
| PF07732         | Multicopper oxidase                                    | CL0026    | $L_{-2}N; L_{-2}N, L_{+1}N; L_{-1}N$                                     | 5LDU <sub>A</sub> | 404             | –                 |
| PF07745         | Glycosyl hydrolase family 53                           | CL0058    | $L_{+1}N$                                                                | 1FHL <sub>A</sub> | 59              | MS                |
| PF07883         | Cupin domain                                           | CL0029    | $L_{-1}C$                                                                | 3BU7 <sub>A</sub> | 224             | C                 |
| PF07936         | Potassium-channel blocking toxin                       | CL0075    | $L_{-1}C$                                                                | 1BDS <sub>A</sub> | 27              | S                 |
| PF07966         | A1 Propeptide                                          | –         | $L_{-1}N; LL_{-1,+1}$                                                    | 1LYA <sub>A</sub> | 70              | CS                |
| PF07974         | EGF-like domain                                        | CL0001    | $L_{-1}C, L_{+1}N, L_{-1}N$                                              | 4Z80 <sub>A</sub> | 203,99,73       | M                 |

Continued on the next page

Table S3 – continued from previous page

| PFAM identifier | PFAM domain                                                          | PFAM clan | Lasso types                                                         | Representant      | Lasso loop size | Cellular location |
|-----------------|----------------------------------------------------------------------|-----------|---------------------------------------------------------------------|-------------------|-----------------|-------------------|
| PF07992         | Pyridine nucleotide-disulphide oxidoreductase                        | CL0063    | $L_{+2N}; L_{+1C}; L_{+1N}$                                         | 2YAU <sub>A</sub> | 125             | –                 |
| PF08127         | Peptidase family C1 propeptide                                       | –         | $L_{-1N}$                                                           | 1CPJ <sub>A</sub> | 67              | CMS               |
| PF08131         | Defensin-like peptide family                                         | CL0075    | $L_{-1C}$                                                           | 1D6B <sub>A</sub> | 17              | S                 |
| PF08189         | Meleagrin/Cygnin family                                              | CL0075    | $L_{-1C}$                                                           | 2MJK <sub>A</sub> | 17              | S                 |
| PF08205         | CD80-like C2-set immunoglobulin domain                               | CL0011    | $L_{+1N}$                                                           | 5VKJ <sub>A</sub> | 129             | M                 |
| PF08212         | Lipocalin-like domain                                                | CL0116    | $L_{-1N}$                                                           | 5EZ2 <sub>A</sub> | 125             | S                 |
| PF08246         | Cathepsin propeptide inhibitor domain (I29)                          | –         | $L_{-1N}$                                                           | 5A24 <sub>A</sub> | 54              | –                 |
| PF08282         | haloacid dehalogenase-like hydrolase                                 | CL0137    | $L_{+1N}$                                                           | 1NF2 <sub>A</sub> | 231             | C                 |
| PF08448         | PAS fold                                                             | CL0183    | $L_{-1C}$                                                           | 6EIB <sub>A</sub> | 67              | –                 |
| PF08534         | Redoxin                                                              | CL0172    | $L_{+1N}; L_{-1C}; L_{-1N}$                                         | 1OC3 <sub>C</sub> | 105             | C                 |
| PF08617         | Kinase binding protein CGI-121                                       | –         | $LS_{2--N}$                                                         | 1ZD0 <sub>A</sub> | 84              | –                 |
| PF08702         | Fibrinogen alpha/beta chain family                                   | –         | $L_{+1C}$                                                           | 1FZA <sub>B</sub> | 86              | –                 |
| PF08773         | Cathepsin C exclusion domain                                         | –         | $L_{-1N}$                                                           | 1K3B <sub>A</sub> | 83              | C                 |
| PF08798         | CRISPR associated protein                                            | CL0362    | $LL_{+1,-1}$                                                        | 5CD4 <sub>I</sub> | 111             | CS                |
| PF08924         | Domain of unknown function (DUF1906)                                 | CL0058    | $L_{+1N}$                                                           | 1SFS <sub>A</sub> | 180             | –                 |
| PF09022         | Staphostatin A                                                       | CL0354    | $L_{+1N}$                                                           | 1OH1 <sub>A</sub> | 40              | C                 |
| PF09117         | MiAMP1                                                               | CL0333    | $L_{-1N}, L_{-1C}$                                                  | 1C01 <sub>A</sub> | 54,27           | S                 |
| PF09207         | Yeast killer toxin                                                   | CL0333    | $L_{-1N}, L_{-1C}$                                                  | 1WKT <sub>A</sub> | 62,32           | S                 |
| PF09258         | Glycosyl transferase family 64 domain                                | CL0110    | $L_{+2N}$                                                           | 1ON8 <sub>A</sub> | 53              | CM                |
| PF09286         | Pro-kumamolisin, activation domain                                   | CL0570    | $L_{-1C}$                                                           | 3EDY <sub>A</sub> | 162             | C                 |
| PF09394         | Chagasin family peptidase inhibitor I42                              | CL0159    | $L_{-1N}$                                                           | 3E1Z <sub>B</sub> | 48              | –                 |
| PF09691         | Type II secretion system pilotin lipoprotein (PulS <sub>OUT</sub> S) | –         | $L_{+1N}$                                                           | 4A56 <sub>A</sub> | 55              | C                 |
| PF09992         | Phosphodiester glycosidase                                           | –         | $L_{-1C}$                                                           | 6U11 <sub>A</sub> | 34              | –                 |
| PF10182         | Flo11 domain                                                         | CL0321    | $L_{+1C}$                                                           | 5FV5 <sub>A</sub> | 131             | M                 |
| PF10250         | GDP-fucose protein                                                   | CL0113    | $L_{+1N}$                                                           | 3ZY3 <sub>B</sub> | 88              | C                 |
| PF10282         | O-fucosyltransferase                                                 | CL0186    | $L_{-1N}$                                                           | 3U4Y <sub>A</sub> | 272             | –                 |
| PF10468         | Lactonase, 7-bladed beta-propeller                                   | CL0075    | $L_{-1C}, L_{-1C}; L_{-1C}$                                         | 2JTO <sub>A</sub> | 18,18           | S                 |
| PF10528         | Carboxypeptidase inhibitor I68                                       | CL0301    | $LS_{2--C}, LS_{2--N}; LS_{2--C}; LS_{2--C}, LL_{-1,+1}, LS_{2--N}$ | 5A3L <sub>A</sub> | 115,88          | M                 |
| PF10564         | GLEYA domain                                                         | –         | $LS_{3+--N}, LS_{3+--N}$                                            | 2JH1 <sub>A</sub> | 37,46           | C                 |
| PF10613         | Sialic-acid binding micronemal adhesive repeat                       | –         | $LS_{3+--N}, LS_{3+--N}$                                            | 2JH1 <sub>A</sub> | 37,46           | C                 |
| PF11032         | Ligated ion channel L-glutamate- and glycine-binding site            | CL0177    | $L_{-1N}$                                                           | 4YKI <sub>B</sub> | 56              | CM                |
| PF11032         | ApoM domain                                                          | CL0116    | $L_{-3N}$                                                           | 2WEW <sub>A</sub> | 89              | S                 |
| PF11475         | Virion protein N terminal domain                                     | –         | $L_{-1C}$                                                           | 4NZ0 <sub>A</sub> | 112             | –                 |
| PF12032         | Regulatory CLIP domain of proteinases                                | CL0678    | $L_{-1C}$                                                           | 2IKD <sub>A</sub> | 32              | S                 |
| PF12308         | Neurogenesis glycoprotein                                            | –         | $L_{-1C}$                                                           | 6QM3 <sub>A</sub> | 183             | CMS               |
| PF12708         | Pectate lyase superfamily protein                                    | CL0268    | $L_{+1C}; L_{+3C}; L_{-1N}, L_{-1N}$                                | 3EQN <sub>A</sub> | 420             | –                 |
| PF12727         | PBP superfamily domain                                               | CL0177    | $L_{-1N}$                                                           | 4JWO <sub>A</sub> | 110             | –                 |
| PF12804         | MobA-like NTP transferase domain                                     | CL0110    | $L_{+1N}$                                                           | 3NGW <sub>A</sub> | 169             | C                 |
| PF12849         | PBP superfamily domain                                               | CL0177    | $L_{+1N}$                                                           | 4OMB <sub>A</sub> | 45              | MS                |
| PF12947         | EGF domain                                                           | CL0001    | $L_{-1N}$                                                           | 6ZYA <sub>A</sub> | 56              | CMS               |
| PF12999         | Glucosidase II beta subunit-like                                     | –         | $L_{+1C}$                                                           | 2LVX <sub>A</sub> | 30              | C                 |
| PF13091         | PLD-like domain                                                      | CL0479    | $L_{+1C}$                                                           | 2ZE4 <sub>A</sub> | 47              | S                 |
| PF13343         | Bacterial extracellular solute-binding protein                       | CL0177    | $L_{-1N}$                                                           | 4R72 <sub>A</sub> | 97              | –                 |
| PF13399         | LytR cell envelope-related transcriptional attenuator                | –         | $L_{+1N}$                                                           | 6Q10 <sub>A</sub> | 59              | M                 |
| PF13407         | Periplasmic binding protein domain                                   | CL0144    | $L_{+1N}$                                                           | 2IPM <sub>A</sub> | 224             | M                 |
| PF13456         | Reverse transcriptase-like                                           | CL0219    | $L_{+3N}$                                                           | 2EHG <sub>A</sub> | 88              | C                 |
| PF13458         | Periplasmic binding protein                                          | CL0144    | $L_{+1N}$                                                           | 4N03 <sub>A</sub> | 259             | –                 |
| PF13472         | GDSL-like Lipase/Acylhydrolase family                                | CL0264    | $L_{-1C}; L_{+1N}$                                                  | 5B5L <sub>A</sub> | 32              | S                 |
| PF13531         | Bacterial extracellular solute-binding protein                       | CL0177    | $L_{-1C}$                                                           | 3AXF <sub>A</sub> | 143             | M                 |
| PF13627         | Prokaryotic lipoprotein-attachment site                              | CL0421    | $L_{-1N}$                                                           | 1S4I <sub>A</sub> | 94              | M                 |
| PF13640         | 2OG-Fe(II) oxygenase superfamily                                     | CL0029    | $L_{-1N}$                                                           | 3GZE <sub>A</sub> | 36              | C                 |

Continued on the next page

Table S3 – continued from previous page

| PFAM identifier | PFAM domain                                                  | PFAM clan | Lasso types                                      | Representant      | Lasso loop size  | Cellular location |
|-----------------|--------------------------------------------------------------|-----------|--------------------------------------------------|-------------------|------------------|-------------------|
| PF13653         | Glycerophosphoryl diester phosphodiesterase family           | CL0384    | $L_{+1N}$                                        | 4Q6X <sub>A</sub> | 145              | S                 |
| PF13841         | Beta defensin                                                | CL0075    | $L_{-1C}$                                        | 5KI9 <sub>A</sub> | 15               | S                 |
| PF13908         | Wnt and FGF inhibitory regulator                             | –         | $L_{-1N}$                                        | 5M0W <sub>A</sub> | 19               | CM                |
| PF13987         | YedD-like protein                                            | –         | $L_{-2N}$                                        | 4HWM <sub>A</sub> | 57               | –                 |
| PF14200         | Ricin-type beta-trefoil lectin domain-like                   | CL0066    | $L_{-1N}$                                        | 3HZB <sub>A</sub> | 62               | –                 |
| PF14416         | PMR5 N terminal Domain                                       | –         | $L_{-1C}$                                        | 6CCI <sub>A</sub> | 297              | CM                |
| PF14497         | Glutathione S-transferase, C-terminal domain                 | CL0497    | $L_{+1N}$                                        | 2WB9 <sub>A</sub> | 171              | –                 |
| PF14537         | Cytochrome c3                                                | CL0317    | $LL_{+2,-1}$                                     | 1Q9I <sub>A</sub> | 180              | M                 |
| PF14565         | Interleukin 22 IL-10-related T-cell-derived-inducible factor | CL0053    | $L_{+1C}$                                        | 1M4R <sub>A</sub> | 93               | S                 |
| PF14845         | beta-acetyl hexosaminidase like                              | CL0546    | $L_{-1N}$                                        | 3NSM <sub>A</sub> | 20               | C                 |
| PF14862         | Big defensin                                                 | CL0075    | $L_{-1C}$                                        | 6QBK <sub>A</sub> | 19               | S                 |
| PF14865         | Macin                                                        | CL0054    | $L_{-1C}$                                        | 2K35 <sub>A</sub> | 44               | MS                |
| PF15177         | Interleukin-28A                                              | CL0053    | $L_{+1C}$                                        | 3HHC <sub>B</sub> | 100              | S                 |
| PF15447         | N-terminal segments of PfEMP1 beta subunit of                | –         | $L_{-1N}$                                        | 2YK0 <sub>A</sub> | 81               | M                 |
| PF15508         | N-acylethanolamine-hydrolyzing acid amidase                  | –         | $L_{-3C}$                                        | 5U81 <sub>A</sub> | 310              | C                 |
| PF15902         | Sortilin, neurotensin receptor 3,                            | CL0434    | $L_{-3C}$                                        | 5NMT <sub>B</sub> | 471              | CM                |
| PF16010         | Cytochrome domain of cellobiose dehydrogenase                | CL0559    | $L_{+6N}$                                        | 4QI7 <sub>A</sub> | 45               | CS                |
| PF16358         | RcsF lipoprotein                                             | CL0522    | $L_{-1C}$                                        | 2Y1B <sub>A</sub> | 45               | M                 |
| PF16414         | Niemann-Pick C1 N terminus                                   | CL0644    | $L_{+1N}$                                        | 5JNX <sub>C</sub> | 27               | CM                |
| PF16470         | Peptidase S8 pro-domain                                      | CL0570    | $LL_{+1,-1}$                                     | 4OMC <sub>A</sub> | 150              | CMS               |
| PF16499         | Alpha galactosidase A                                        | CL0058    | $L_{+1N}; L_{+1N}, L_{-1N}; L_{-1N}$             | 3A21 <sub>A</sub> | 41               | C                 |
| PF16649         | Interleukin 23 subunit alpha                                 | CL0053    | $L_{-1N}$                                        | 4GRW <sub>F</sub> | 53               | CMS               |
| PF16656         | Purple acid Phosphatase, N-terminal domain                   | CL0159    | $L_{+1N}$                                        | 6GIT <sub>A</sub> | 82               | –                 |
| PF16822         | SGNH hydrolase-like domain, acetyltransferase AlgX           | CL0264    | $L_{-1C}$                                        | 4KNC <sub>B</sub> | 186              | M                 |
| PF16841         | Ca-dependent carbohydrate-binding module xylan-binding       | CL0202    | $L_{-1N}$                                        | 2XFD <sub>A</sub> | 12               | –                 |
| PF17484         | N-Lobe handle Tf-binding protein B                           | –         | $LS_{3-+-+N}, L_{+1N}, L_{-1N}, LS_{2--N}$       | 3VE1 <sub>B</sub> | 195,273, 220,192 | CMS               |
| PF17808         | Fn3-like domain from Purple Acid Phosphatase                 | CL0159    | $L_{+2N}$                                        | 3ZK4 <sub>A</sub> | 165              | –                 |
| PF17858         | Platypus intermediate defensin-like peptide                  | CL0075    | $L_{-1C}$                                        | 2MN3 <sub>A</sub> | 15               | S                 |
| PF17859         | Pelovaterin                                                  | CL0075    | $L_{-1C}$                                        | 2JR3 <sub>A</sub> | 17               | S                 |
| PF17860         | RK-1-like defensin                                           | CL0075    | $L_{-1C}$                                        | 1EWS <sub>A</sub> | 15               | S                 |
| PF17900         | Peptidase M1 N-terminal domain                               | CL0672    | $L_{-1C}$                                        | 6ATK <sub>E</sub> | 28               | M                 |
| PF17967         | Pullulanase N2 domain                                        | –         | $L_{+1N}$                                        | 4CVW <sub>C</sub> | 56               | C                 |
| PF17996         | Carbohydrate esterase 2 N-terminal                           | CL0202    | $L_{-1C}$                                        | 4XVH <sub>A</sub> | 173              | –                 |
| PF18158         | Adaptive response protein AidB N-terminal domain             | CL0544    | $L_{-1N}$                                        | 3DJL <sub>A</sub> | 513              | C                 |
| PF18193         | Fibrillin 1 unique N-terminal domain                         | CL0001    | $L_{-1N}$                                        | 1UZJ <sub>A</sub> | 26               | C                 |
| PF18207         | Leukemia inhibitory factor receptor N-terminal domain        | CL0159    | $L_{+1C}, L_{+1C}$                               | 2Q7N <sub>B</sub> | 123,114          | MS                |
| PF18338         | Lower baseplate protein N-terminal domain                    | CL0606    | $L_{-1N}$                                        | 5E7F <sub>A</sub> | 67               | CMS               |
| PF18426         | Tle cognate immunity protein 4 C-terminal domain             | –         | $L_{-1C}$                                        | 5XMG <sub>A</sub> | 194              | –                 |
| PF18452         | Immunoglobulin domain                                        | CL0011    | $L_{-2C}; L_{+1C}, L_{-2C}$                      | 1G0Y <sub>R</sub> | 44               | CMS               |
| PF18487         | Thrombospondin type 1 repeat                                 | –         | $L_{-2N}, L_{-2C}; L_{-1N}$                      | 6RUR <sub>B</sub> | 641,73           | S                 |
| PF18611         | IL-3 receptor alpha chain N-terminal domain                  | CL0159    | $L_{+1C}$                                        | 5UV8 <sub>B</sub> | 69               | MS                |
| PF18626         | Glutaminase                                                  | CL0125    | $L_{-1N}, L_{-1N}; L_{-1N}, L_{-1N}, LL_{+1,+2}$ | 2KSV <sub>A</sub> | 97,50            | –                 |
| PF18911         | PKD domain                                                   | CL0159    | $LL_{+1,-1}$                                     | 6NZ0 <sub>A</sub> | 73               | –                 |
| PF19429         | Evasins Class A                                              | –         | $L_{-2C}$                                        | 3FPU <sub>B</sub> | 25               | S                 |

## References

- [Arolas et al., 2012] Arolas, J. L., Broder, C., Jefferson, T., Guevara, T., Sterchi, E. E., Bode, W., Stöcker, W., Becker-Pauly, C. and Gomis-Rüth, F. X. (2012). Structural basis for the sheddase function of human meprin  $\beta$  metalloproteinase at the plasma membrane. *Proceedings of the National Academy of Sciences* *109*, 16131–16136.
- [Dabrowski-Tumanski et al., 2016] Dabrowski-Tumanski, P., Niemyska, W., Pasznik, P. and Sulkowska, J. I. (2016). LassoProt: server to analyze biopolymers with lassos. *Nucleic Acid Research* .
- [Niemyska et al., 2016] Niemyska, W., Dabrowski-Tumanski, P., Kadlof, M., Haglund, E., Sułkowski, P. and Sulkowska, J. I. (2016). Complex lasso: new entangled motifs in proteins. *Scientific reports* *6*, 36895.
- [Thangudu et al., 2008] Thangudu, R. R., Manoharan, M., Srinivasan, N., Cadet, F., Sowdhamini, R. and Offmann, B. (2008). Analysis on conservation of disulphide bonds and their structural features in homologous protein domain families. *BMC structural biology* *8*, 1.
- [Tsai et al., 1999] Tsai, J., Taylor, R., Chothia, C. and Gerstein, M. (1999). The packing density in proteins: standard radii and volumes. *Journal of molecular biology* *290*, 253–266.
