# Supplementary material for: Lasso Proteins—Unifying Cysteine Knots and Miniproteins
Source: Polymers (Basel). 2021 Nov 18;13(22):3988. doi: 10.3390/polym13223988 (PMC8621785; doi:10.3390/polym13223988)
Supplement: Supplementary file 1 [file polymers-13-03988-s001.zip › biblio.bib]

@article{niemyska2020gln,
  title={GLN--a method to reveal unique properties of lasso type topology in proteins},
  author={Niemyska, Wanda and Millett, Kenneth C and Sulkowska, Joanna I},
  journal={Scientific Reports},
  volume={10},
  number={1},
  pages={15186},
  year={2020}
}
@article{niemyska2016complex,
  title={Complex lasso: new entangled motifs in proteins},
  author={Niemyska, Wanda and Dabrowski-Tumanski, Pawel and Kadlof, Michal and Haglund, Ellinor and Su{\l}kowski, Piotr and Sulkowska, Joanna I},
  journal={Scientific reports},
  volume={6},
  pages={36895},
  year={2016},
  publisher={Nature Publishing Group}
}
@article{haglund2012unique,
  title={The unique cysteine knot regulates the pleotropic hormone leptin},
  author={Haglund, Ellinor and Su{\l}kowska, Joanna I and He, Zhao and Feng, Gen-Sheng and Jennings, Patricia A and Onuchic, Jos{\'e} N},
  journal={PLoS ONE},
  volume={7},
  number={9},
  pages={e45654},
  year={2012}
}
@article{haglund2014pierced,
  title={Pierced Lasso Bundles Are a New Class of Knot-like Motifs},
  author={Haglund, Ellinor and Sulkowska, Joanna I and Noel, Jeffrey K and Lammert, Heiko and Onuchic, Jos{\'e} N and Jennings, Patricia A},
  journal={PLoS Comput Biol },
  volume={10},
  number={6},
  pages={e1003613},
  year={2014}
}
@article{mallam2012knot,
  title={Knot formation in newly translated proteins is spontaneous and accelerated by chaperonins},
  author={Mallam, Anna L and Jackson, Sophie E},
  journal={Nature chemical biology},
  volume={8},
  number={2},
  pages={147--153},
  year={2012},
  publisher={Nature Publishing Group}
}
@article{shimizu2001cell,
  title={Cell-free translation reconstituted with purified components},
  author={Shimizu, Yoshihiro and Inoue, Akio and Tomari, Yukihide and Suzuki, Tsutomu and Yokogawa, Takashi and Nishikawa, Kazuya and Ueda, Takuya},
  journal={Nature biotechnology},
  volume={19},
  number={8},
  pages={751--755},
  year={2001},
  publisher={Nature Publishing Group}
}
@article{shimizu2005protein,
  title={Protein synthesis by pure translation systems},
  author={Shimizu, Yoshihiro and Kanamori, Takashi and Ueda, Takuya},
  journal={Methods},
  volume={36},
  number={3},
  pages={299--304},
  year={2005},
  publisher={Elsevier}
}
@article{anantharaman2002spout,
  title={SPOUT: a class of methyltransferases that includes spoU and trmD RNA methylase superfamilies, and novel superfamilies of predicted prokaryotic RNA methylases},
  author={Anantharaman, Vivek and Koonin, Eugene V and Aravind, L},
  journal={Journal of molecular microbiology and biotechnology},
  volume={4},
  number={1},
  pages={71--76},
  year={2002},
  publisher={HORIZON SCIENTIFIC PRESS PO BOX 1, NORFOLK, WYMONDHAM NR18 0JA, ENGLAND}
}
@article{tkaczuk2007structural,
  title={Structural and evolutionary bioinformatics of the SPOUT superfamily of methyltransferases},
  author={Tkaczuk, Karolina L and Dunin-Horkawicz, Stanislaw and Purta, Elzbieta and Bujnicki, Janusz M},
  journal={BMC bioinformatics},
  volume={8},
  number={1},
  pages={73},
  year={2007},
  publisher={BioMed Central Ltd}
}
@article{lim2015mechanistic,
  title={Mechanistic Insights into the Folding of Knotted Proteins In Vitro and In Vivo},
  author={Lim, Nicole CH and Jackson, Sophie E},
  journal={Journal of molecular biology},
  volume={427},
  number={2},
  pages={248--258},
  year={2015},
  publisher={Elsevier}
}
@article{mallam2008knotted,
  title={Knotted fusion proteins reveal unexpected possibilities in protein folding},
  author={Mallam, Anna L and Onuoha, Shimobi C and Grossmann, J G{\"u}nter and Jackson, Sophie E},
  journal={Molecular cell},
  volume={30},
  number={5},
  pages={642--648},
  year={2008},
  publisher={Elsevier}
}
@article{mallam2010experimental,
  title={Experimental detection of knotted conformations in denatured proteins},
  author={Mallam, Anna L and Rogers, Joseph M and Jackson, Sophie E},
  journal={Proceedings of the National Academy of Sciences},
  volume={107},
  number={18},
  pages={8189--8194},
  year={2010},
  publisher={National Acad Sciences}
}
@article{king2010structure,
  title={Structure and folding of a designed knotted protein},
  author={King, Neil P and Jacobitz, Alex W and Sawaya, Michael R and Goldschmidt, Lukasz and Yeates, Todd O},
  journal={Proceedings of the National Academy of Sciences},
  volume={107},
  number={48},
  pages={20732--20737},
  year={2010},
  publisher={National Acad Sciences}
}
@article{pettersen2004ucsf,
  title={UCSF Chimera—a visualization system for exploratory research and analysis},
  author={Pettersen, Eric F and Goddard, Thomas D and Huang, Conrad C and Couch, Gregory S and Greenblatt, Daniel M and Meng, Elaine C and Ferrin, Thomas E},
  journal={Journal of computational chemistry},
  volume={25},
  number={13},
  pages={1605--1612},
  year={2004},
  publisher={Wiley Online Library}
}
@article{humphrey1996vmd,
  title={VMD: visual molecular dynamics},
  author={Humphrey, William and Dalke, Andrew and Schulten, Klaus},
  journal={Journal of molecular graphics},
  volume={14},
  number={1},
  pages={33--38},
  year={1996},
  publisher={Elsevier}
}
@article{hallberg2000new,
  title={A new scaffold for binding haem in the cytochrome domain of the extracellular flavocytochrome cellobiose dehydrogenase},
  author={Hallberg, B Martin and Bergfors, Terese and B{\"a}ckbro, Kristina and Pettersson, G{\"o}ran and Henriksson, Gunnar and Divne, Christina},
  journal={Structure},
  volume={8},
  number={1},
  pages={79--88},
  year={2000},
  publisher={Elsevier}
}
@article{zamocky2004ancestral,
  title={Ancestral gene fusion in cellobiose dehydrogenases reflects a specific evolution of GMC oxidoreductases in fungi},
  author={Z{\'a}mock{\`y}, Marcel and Hallberg, Martin and Ludwig, Roland and Divne, Christina and Haltrich, Dietmar},
  journal={Gene},
  volume={338},
  number={1},
  pages={1--14},
  year={2004},
  publisher={Elsevier}
}
@article{monod1965nature,
  title={On the nature of allosteric transitions: a plausible model},
  author={Monod, Jacque and Wyman, Jeffries and Changeux, Jean-Pierre},
  journal={Journal of molecular biology},
  volume={12},
  number={1},
  pages={88--118},
  year={1965},
  publisher={Elsevier}
}
@article{hashizume2011crystal,
  title={Crystal structures of protein glutaminase and its pro forms converted into enzyme-substrate complex},
  author={Hashizume, Ryota and Maki, Yukiko and Mizutani, Kimihiko and Takahashi, Nobuyuki and Matsubara, Hiroyuki and Sugita, Akiko and Sato, Kimihiko and Yamaguchi, Shotaro and Mikami, Bunzo},
  journal={Journal of Biological Chemistry},
  volume={286},
  number={44},
  pages={38691--38702},
  year={2011},
  publisher={ASBMB}
}
@article{yamada20022,
  title={The 2.0 {\AA} crystal structure of catalase-peroxidase from Haloarcula marismortui},
  author={Yamada, Yusuke and Fujiwara, Taketomo and Sato, Takao and Igarashi, Noriyuki and Tanaka, Nobuo},
  journal={Nature Structural \& Molecular Biology},
  volume={9},
  number={9},
  pages={691--695},
  year={2002},
  publisher={Nature Publishing Group}
}
@article{gasselhuber2015eukaryotic,
  title={Eukaryotic Catalase-Peroxidase: The Role of the Trp-Tyr-Met Adduct in Protein Stability, Substrate Accessibility, and Catalysis of Hydrogen Peroxide Dismutation},
  author={Gasselhuber, Bernhard and Carpena, Xavi and Graf, Michael MH and Pirker, Katharina F and Nicolussi, Andrea and Sündermann, Axel and Hofbauer, Stefan and Zamocky, Marcel and Furtmüller, Paul G and Jakopitsch, Christa and others},
  journal={Biochemistry},
  volume={54},
  number={35},
  pages={5425--5438},
  year={2015},
  publisher={ACS Publications}
}
@incollection{li2015lasso,
  title={Lasso Peptide Bioengineering and Bioprospecting},
  author={Li, Yanyan and Zirah, S{\'e}verine and Rebuffat, Sylvie},
  booktitle={Lasso Peptides},
  pages={},
  year={2015},
  publisher={Springer}
}
@article{frechet1994solution,
  title={Solution structure of RP 71955, a new 21 amino acid tricyclic peptide active against HIV-1 virus},
  author={Frechet, D and Guitton, JD and Herman, F and Faucher, D and Helynck, G and Monegier du Sorbier, B and Ridoux, JP and James-Surcouf, E and Vuilhorgne, M},
  journal={Biochemistry},
  volume={33},
  number={1},
  pages={42--50},
  year={1994},
  publisher={ACS Publications}
}
@article{chung2011crystal,
  title={Crystal Structure of a Viral Protease Intramolecular Acyl-enzyme Complex INSIGHTS INTO cis-CLEAVAGE AT THE VP4/VP3 JUNCTION OF TELLINA BIRNAVIRUS},
  author={Chung, Ivy Yeuk Wah and Paetzel, Mark},
  journal={Journal of Biological Chemistry},
  volume={286},
  number={14},
  pages={12475--12482},
  year={2011},
  publisher={ASBMB}
}
@article{bolinger2010stevedore,
  title={A Stevedore's protein knot},
  author={B{\"o}linger, Daniel and Su{\l}kowska, Joanna I and Hsu, Hsiao-Ping and Mirny, Leonid A and Kardar, Mehran and Onuchic, Jos{\'e} N and Virnau, Peter},
  journal={PLoS Comput Biol},
  volume={6},
  number={4},
  pages={e1000731},
  year={2010},
  publisher={Public Library of Science}
}
@article{taylor2000deeply,
  title={A deeply knotted protein structure and how it might fold},
  author={Taylor, William R},
  journal={Nature},
  volume={406},
  number={6798},
  pages={916--919},
  year={2000},
  publisher={Nature Publishing Group}
}
@article{cao2005bovine,
  title={Bovine mitochondrial peroxiredoxin III forms a two-ring catenane},
  author={Cao, Zhenbo and Roszak, Aleksander W and Gourlay, Louise J and Lindsay, J Gordon and Isaacs, Neil W},
  journal={Structure},
  volume={13},
  number={11},
  pages={1661--1664},
  year={2005},
  publisher={Elsevier}
}
@article{helgstrand2003refined,
  title={The refined structure of a protein catenane: the HK97 bacteriophage capsid at 3.44 {\AA} resolution},
  author={Helgstrand, Charlotte and Wikoff, William R and Duda, Robert L and Hendrix, Roger W and Johnson, John E and Liljas, Lars},
  journal={Journal of molecular biology},
  volume={334},
  number={5},
  pages={885--899},
  year={2003},
  publisher={Elsevier}
}
@article{craik2001cystine,
  title={The cystine knot motif in toxins and implications for drug design},
  author={Craik, David J and Daly, Norelle L and Waine, Clement},
  journal={Toxicon},
  volume={39},
  number={1},
  pages={43--60},
  year={2001},
  publisher={Elsevier}
}
@article{blond1999cyclic,
  title={The cyclic structure of microcin J25, a 21-residue peptide antibiotic from Escherichia coli},
  author={Blond, Alain and P{\'e}duzzi, Jean and Goulard, Christophe and Chiuchiolo, Mar{\'\i}a J and Barth{\'e}l{\'e}my, Michel and Prigent, Yann and Salom{\'o}n, Ra{\'u}l A and Far{\'\i}as, Ricardo N and Moreno, Felipe and Rebuffat, Sylvie},
  journal={European Journal of Biochemistry},
  volume={259},
  number={3},
  pages={747--756},
  year={1999},
  publisher={Wiley Online Library}
}
@article{haglund2015engineering,
  title={Engineering covalent loops in proteins can serve as an on/off switch to regulate threaded topologies},
  author={Haglund, Ellinor},
  journal={Journal of Physics: Condensed Matter},
  volume={27},
  number={35},
  pages={354107},
  year={2015},
  publisher={IOP Publishing}
}
@article{bhattacharyya2004disulfide,
  title={Disulfide bonds, their stereospecific environment and conservation in protein structures},
  author={Bhattacharyya, Rajasri and Pal, Debnath and Chakrabarti, Pinak},
  journal={Protein Engineering Design and Selection},
  volume={17},
  number={11},
  pages={795--808},
  year={2004},
  publisher={Oxford Univ Press}
}
@article{thangudu2008analysis,
  title={Analysis on conservation of disulphide bonds and their structural features in homologous protein domain families},
  author={Thangudu, Ratna R and Manoharan, Malini and Srinivasan, N and Cadet, Fr{\'e}d{\'e}ric and Sowdhamini, R and Offmann, Bernard},
  journal={BMC structural biology},
  volume={8},
  number={1},
  pages={1},
  year={2008},
  publisher={BioMed Central}
}
@article{schmidt2006allosteric,
  title={Allosteric disulfide bonds},
  author={Schmidt, Bryan and Ho, Lorraine and Hogg, Philip J},
  journal={Biochemistry},
  volume={45},
  number={24},
  pages={7429--7433},
  year={2006},
  publisher={ACS Publications}
}
@article{jones1992rapid,
  title={The rapid generation of mutation data matrices from protein sequences},
  author={Jones, David T and Taylor, William R and Thornton, Janet M},
  journal={Computer applications in the biosciences: CABIOS},
  volume={8},
  number={3},
  pages={275--282},
  year={1992},
  publisher={Oxford Univ Press}
}
@article{gupta2004classification,
  title={A classification of disulfide patterns and its relationship to protein structure and function},
  author={Gupta, Abhas and Van Vlijmen, Herman WT and Singh, Juswinder},
  journal={Protein science},
  volume={13},
  number={8},
  pages={2045--2058},
  year={2004},
  publisher={Wiley Online Library}
}
@article{mas2001classification,
  title={Classification of protein disulphide-bridge topologies},
  author={Mas, Jos{\'e} M and Aloy, Patrick and Marti-Renom, Marc A. and Oliva, Baldomero and de Llorens, R and Aviles, Francesc X. and Querol, Enrique},
  journal={Journal of computer-aided molecular design},
  volume={15},
  number={5},
  pages={477--487},
  year={2001},
  publisher={Springer}
}
@article{sulkowska2012conservation,
  title={Conservation of complex knotting and slipknotting patterns in proteins},
  author={Su{\l}kowska, Joanna I and Rawdon, Eric J and Millett, Kenneth C and Onuchic, Jose N and Stasiak, Andrzej},
  journal={Proceedings of the National Academy of Sciences},
  volume={109},
  number={26},
  pages={E1715--E1723},
  year={2012},
  publisher={National Acad Sciences}
}
@article{arolas2012structural,
  title={Structural basis for the sheddase function of human meprin $\beta$ metalloproteinase at the plasma membrane},
  author={Arolas, Joan L and Broder, Claudia and Jefferson, Tamara and Guevara, Tibisay and Sterchi, Erwin E and Bode, Wolfram and St{\"o}cker, Walter and Becker-Pauly, Christoph and Gomis-R{\"u}th, F Xavier},
  journal={Proceedings of the National Academy of Sciences},
  volume={109},
  number={40},
  pages={16131--16136},
  year={2012},
  publisher={National Acad Sciences}
}
@article{okamoto2014quasi,
  title={(Quasi-) Racemic X-ray Structures of Glycosylated and Non-Glycosylated Forms of the Chemokine Ser-CCL1 Prepared by Total Chemical Synthesis},
  author={Okamoto, Ryo and Mandal, Kalyaneswar and Sawaya, Michael R and Kajihara, Yasuhiro and Yeates, Todd O and Kent, Stephen BH},
  journal={Angewandte Chemie International Edition},
  volume={53},
  number={20},
  pages={5194--5198},
  year={2014},
  publisher={Wiley Online Library}
}
@article{@article{wei2009through,
  title={Through the looking glass, mechanistic insights from enantiomeric human defensins},
  author={Wei, Gang and de Leeuw, Erik and Pazgier, Marzena and Yuan, Weirong and Zou, Guozhang and Wang, Jianfeng and Ericksen, Bryan and Lu, Wei-Yue and Lehrer, Robert I and Lu, Wuyuan},
  journal={Journal of Biological Chemistry},
  volume={284},
  number={42},
  pages={29180--29192},
  year={2009},
  publisher={ASBMB}
}
@article{wei2009through,
  title={Through the looking glass, mechanistic insights from enantiomeric human defensins},
  author={Wei, Gang and de Leeuw, Erik and Pazgier, Marzena and Yuan, Weirong and Zou, Guozhang and Wang, Jianfeng and Ericksen, Bryan and Lu, Wei-Yue and Lehrer, Robert I and Lu, Wuyuan},
  journal={Journal of Biological Chemistry},
  volume={284},
  number={42},
  pages={29180--29192},
  year={2009},
  publisher={ASBMB}
}
@article{mcdonald1993structural,
  title={A structural superfamily of growth factors containing a cystine knot motif},
  author={McDonald, Neil Q and Hendrickson, Wayne A},
  journal={Cell},
  volume={73},
  number={3},
  pages={421--424},
  year={1993},
  publisher={Cell Press}
}
@article{murray1993topological,
  title={Topological similarities in TGF-$\beta$2, PDGF-BB and NGF define a superfamily of polypeptide growth factors},
  author={Murray-Rust, Judith and McDonald, Neil Q and Blundell, Tom L and Hosang, Markus and Oefner, Christian and Winkler, Fritz and Bradshaw, Ralph A},
  journal={Structure},
  volume={1},
  number={2},
  pages={153--159},
  year={1993},
  publisher={Elsevier}
}
@article{rosengren2003microcin,
  title={Microcin J25 has a threaded sidechain-to-backbone ring structure and not a head-to-tail cyclized backbone},
  author={Rosengren, K Johan and Clark, Richard J and Daly, Norelle L and G{\"o}ransson, Ulf and Jones, Alun and Craik, David J},
  journal={Journal of the American Chemical Society},
  volume={125},
  number={41},
  pages={12464--12474},
  year={2003},
  publisher={ACS Publications}
}
@article{sulkowska2009dodging,
  title={Dodging the crisis of folding proteins with knots},
  author={Su{\l}kowska, Joanna I and Su{\l}kowski, Piotr and Onuchic, Jos{\'e}},
  journal={Proceedings of the National Academy of Sciences},
  volume={106},
  number={9},
  pages={3119--3124},
  year={2009},
  publisher={National Acad Sciences}
}
@article{dabrowski2016lassoprot,
  title={LassoProt: server to analyze biopolymers with lassos},
  author={Dabrowski-Tumanski, Pawel and Niemyska, Wanda and Pasznik, Pawel and Sulkowska, Joanna I},
  journal={Nucleic Acid Research},
  volume={},
  number={},
  pages={},
  year={2016},
  publisher={Oxford Univ Press}
}
@article{hegemann2015lasso,
  title={Lasso peptides: an intriguing class of bacterial natural products},
  author={Hegemann, Julian D and Zimmermann, Marcel and Xie, Xiulan and Marahiel, Mohamed A},
  journal={Accounts of chemical research},
  volume={48},
  number={7},
  pages={1909--1919},
  year={2015},
  publisher={ACS Publications}
}
@article{zimmermann2013astexin,
  title={The astexin-1 lasso peptides: biosynthesis, stability, and structural studies},
  author={Zimmermann, Marcel and Hegemann, Julian D and Xie, Xiulan and Marahiel, Mohamed A},
  journal={Chemistry \& biology},
  volume={20},
  number={4},
  pages={558--569},
  year={2013},
  publisher={Elsevier}
}
@article{knappe2011introducing,
  title={Introducing lasso peptides as molecular scaffolds for drug design: engineering of an integrin antagonist},
  author={Knappe, Thomas A and Manzenrieder, Florian and Mas-Moruno, Carlos and Linne, Uwe and Sasse, Florenz and Kessler, Horst and Xie, Xiulan and Marahiel, Mohamed A},
  journal={Angewandte Chemie International Edition},
  volume={50},
  number={37},
  pages={8714--8717},
  year={2011},
  publisher={Wiley Online Library}
}
@article{lee2007crystal,
  title={Crystal structure of the VP4 protease from infectious pancreatic necrosis virus reveals the acyl-enzyme complex for an intermolecular self-cleavage reaction},
  author={Lee, Jaeyong and Feldman, Anat R and Delmas, Bernard and Paetzel, Mark},
  journal={Journal of Biological Chemistry},
  volume={282},
  number={34},
  pages={24928--24937},
  year={2007},
  publisher={ASBMB}
}
@article{adelman2004molecular,
  title={Molecular mechanism of transcription inhibition by peptide antibiotic Microcin J25},
  author={Adelman, Karen and Yuzenkova, Julia and La Porta, Arthur and Zenkin, Nikolay and Lee, Jookyung and Lis, John T and Borukhov, Sergei and Wang, Michelle D and Severinov, Konstantin},
  journal={Molecular cell},
  volume={14},
  number={6},
  pages={753--762},
  year={2004},
  publisher={Elsevier}
}
@article{jung2009hydramacin,
  title={Hydramacin-1, structure and antibacterial activity of a protein from the basal metazoan Hydra},
  author={Jung, Sascha and Dingley, Andrew J and Augustin, Ren{\'e} and Anton-Erxleben, Friederike and Stanisak, Mareike and Gelhaus, Christoph and Gutsmann, Thomas and Hammer, Malte U and Podschun, Rainer and Bonvin, Alexandre MJJ and others},
  journal={Journal of Biological Chemistry},
  volume={284},
  number={3},
  pages={1896--1905},
  year={2009},
  publisher={ASBMB}
}
@article{dabrowski2016there,
  title={Are there links in proteins?},
  author={Dabrowski-Tumanski, Pawel and Sulkowska, Joanna I},
  journal={Under review},
  pages={},
  volume={},
  year={2016},
  publisher={}
}
@article{dabrowski2016linkprot,
  title={LinkProt: a database collecting information about biological links},
  author={Dabrowski-Tumanski, Pawel and Jarmolinska, Aleksandra I and Niemyska, Wanda and Rawdon, Eric J and Millett, Kenneth C and Sulkowska, Joanna I},
  journal={Nucleic acids research},
  pages={},
  volume={},
  year={2016},
  publisher={Oxford Univ Press}
}
@article{yeates2007knotted,
  title={Knotted and topologically complex proteins as models for studying folding and stability},
  note = {[PubMed:\href{http://www.ncbi.nlm.nih.gov/pubmed/17967433}{17967433}]
  [PubMed Central:\href{http://www.ncbi.nlm.nih.gov/pmc/articles/PMC2179896}{PMC2179896}]
  [doi:\href{http://dx.doi.org/10.1016/j.cbpa.2007.10.002}{10.1016/j.cbpa.2007.10.002}]},
  author={Yeates, Todd O and Norcross, Todd S and King, Neil P},
  journal={Current opinion in chemical biology},
  volume={11},
  number={6},
  pages={595--603},
  year={2007},
  publisher={Elsevier}
}
@article{taylor2007protein,
  title={Protein knots and fold complexity: some new twists},
  author={Taylor, William R},
  note = {[PubMed:\href{http://www.ncbi.nlm.nih.gov/pubmed/17500039}{17500039}]
  [doi:\href{http://dx.doi.org/10.1016/j.compbiolchem.2007.03.002}{10.1016/j.compbiolchem.2007.03.002}]},
  journal={Computational biology and chemistry},
  volume={31},
  number={3},
  pages={151--162},
  year={2007},
  publisher={Elsevier}
}
@article{bayro2003structure,
  title={Structure of antibacterial peptide microcin J25: a 21-residue lariat protoknot},
  note = {[PubMed:\href{http://www.ncbi.nlm.nih.gov/pubmed/14531661}{14531661}]
  [doi:\href{http://dx.doi.org/10.1021/ja036677e}{10.1021/ja036677e}]},
  author={Bayro, Marvin J and Mukhopadhyay, Jayanta and Swapna, GVT and Huang, Janet Y and Ma, Li-Chung and Sineva, Elena and Dawson, Philip E and Montelione, Gaetano T and Ebright, Richard H},
  journal={Journal of the American Chemical Society},
  volume={125},
  number={41},
  pages={12382--12383},
  year={2003},
  publisher={ACS Publications}
}
@article{allen2016self,
  title={Self-assembly of catenanes from lasso peptides},
  author={Allen, Caitlin D and Link, A James},
  journal={Journal of the American Chemical Society},
  year={2016},
  volume={138},
  pages={14214--14217},
  publisher={ACS Publications}
}
@article{green2007160,
  title={A 160-kilobit molecular electronic memory patterned at 1011 bits per square centimetre},
  author={Green, Jonathan E and Choi, Jang Wook and Boukai, Akram and Bunimovich, Yuri and Johnston-Halperin, Ezekiel and DeIonno, Erica and Luo, Yi and Sheriff, Bonnie A and Xu, Ke and Shin, Young Shik and others},
  journal={Nature},
  volume={445},
  number={7126},
  pages={414--417},
  year={2007},
  publisher={Nature Publishing Group}
}
@article{tsai1999packing,
  title={The packing density in proteins: standard radii and volumes},
  author={Tsai, Jerry and Taylor, Robin and Chothia, Cyrus and Gerstein, Mark},
  journal={Journal of molecular biology},
  volume={290},
  number={1},
  pages={253--266},
  year={1999},
  publisher={Elsevier}
}
@article{dabrowski2019theta,
  title={$\theta$-curves in proteins},
  author={Dabrowski-Tumanski, Pawel and Goundaroulis, Dimos and Stasiak, Andrzej and Sulkowska, Joanna I},
  journal={arXiv preprint arXiv:1908.05919},
  year={2019},
  volume={}
}
@article{dabrowski2019statistical,
  title={Statistical properties of lasso-shape polymers and their implications for complex lasso proteins function},
  author={Dabrowski-Tumanski, Pawel and Gren, Bartosz and Sulkowska, Joanna I},
  journal={Polymers},
  volume={11},
  number={4},
  pages={707},
  year={2019},
  publisher={Multidisciplinary Digital Publishing Institute}
}
@article{dabrowski2017topological,
  title={Topological knots and links in proteins},
  author={Dabrowski-Tumanski, Pawel and Sulkowska, Joanna I},
  journal={Proceedings of the National Academy of Sciences},
  volume={114},
  number={13},
  pages={3415--3420},
  year={2017},
  publisher={National Acad Sciences}
}
@article{dabrowski2019topoly,
  title={Topoly: Python package to analyze topology of polymers},
  author={Dabrowski-Tumanski, Pawel and Rubach, Pawel and Niemyska, Wanda and Gren, Bartosz Ambrozy and Sulkowska, Joanna Ida},
  journal={Briefings in Bioinformatics},
  year={2019},
  volume={bbaa196}
}
@article{yan2001design,
  title={Design and synthesis of a protein catenane},
  author={Yan, Liang Z and Dawson, Philip E},
  journal={Angewandte Chemie},
  volume={113},
  number={19},
  pages={3737--3739},
  year={2001},
  publisher={Wiley Online Library}
}
@article{boutz2007discovery,
  title={Discovery of a thermophilic protein complex stabilized by topologically interlinked chains},
  author={Boutz, Daniel R and Cascio, Duilio and Whitelegge, Julian and Perry, L Jeanne and Yeates, Todd O},
  journal={Journal of molecular biology},
  volume={368},
  number={5},
  pages={1332--1344},
  year={2007},
  publisher={Elsevier}
}
@article{gierut2017pylasso,
  title={PyLasso: a PyMOL plugin to identify lassos},
  author={Gierut, Aleksandra M and Niemyska, Wanda and Dabrowski-Tumanski, Pawel and Su{\l}kowski, Piotr and Sulkowska, Joanna I},
  journal={Bioinformatics},
  volume={33},
  number={23},
  pages={3819--3821},
  year={2017},
  publisher={Oxford University Press}
}

@article{postic2017knottin,
    author = {Postic, Guillaume and Gracy, Jérôme and Périn, Charlotte and Chiche, Laurent and Gelly, Jean-Christophe},
    title = "{KNOTTIN: the database of inhibitor cystine knot scaffold after 10 years, toward a systematic structure modeling}",
    journal = {Nucleic Acids Research},
    volume = {46},
    number = {D1},
    pages = {D454-D458},
    year = {2017},
    month = {11},
    issn = {0305-1048},
    doi = {10.1093/nar/gkx1084},
    url = {https://doi.org/10.1093/nar/gkx1084},
    eprint = {https://academic.oup.com/nar/article-pdf/46/D1/D454/23162261/gkx1084.pdf},
}

@article{dabrowski2018knotprot,
    author = {Dabrowski-Tumanski, Pawel and Rubach, Pawel and Goundaroulis, Dimos and Dorier, Julien and Sułkowski, Piotr and Millett, Kenneth C and Rawdon, Eric J and Stasiak, Andrzej and Sulkowska, Joanna I},
    title = "{KnotProt 2.0: a database of proteins with knots and other entangled structures}",
    journal = {Nucleic Acids Research},
    volume = {47},
    number = {D1},
    pages = {D367-D375},
    year = {2018},
    month = {12},
    issn = {0305-1048},
    doi = {10.1093/nar/gky1140},
    url = {https://doi.org/10.1093/nar/gky1140},
    eprint = {https://academic.oup.com/nar/article-pdf/47/D1/D367/27437560/gky1140.pdf},
}
